# Supplementary material
Source: ML conference proceedings conference paper supplement (https://openreview.net/forum?id=THqWPzL00e)

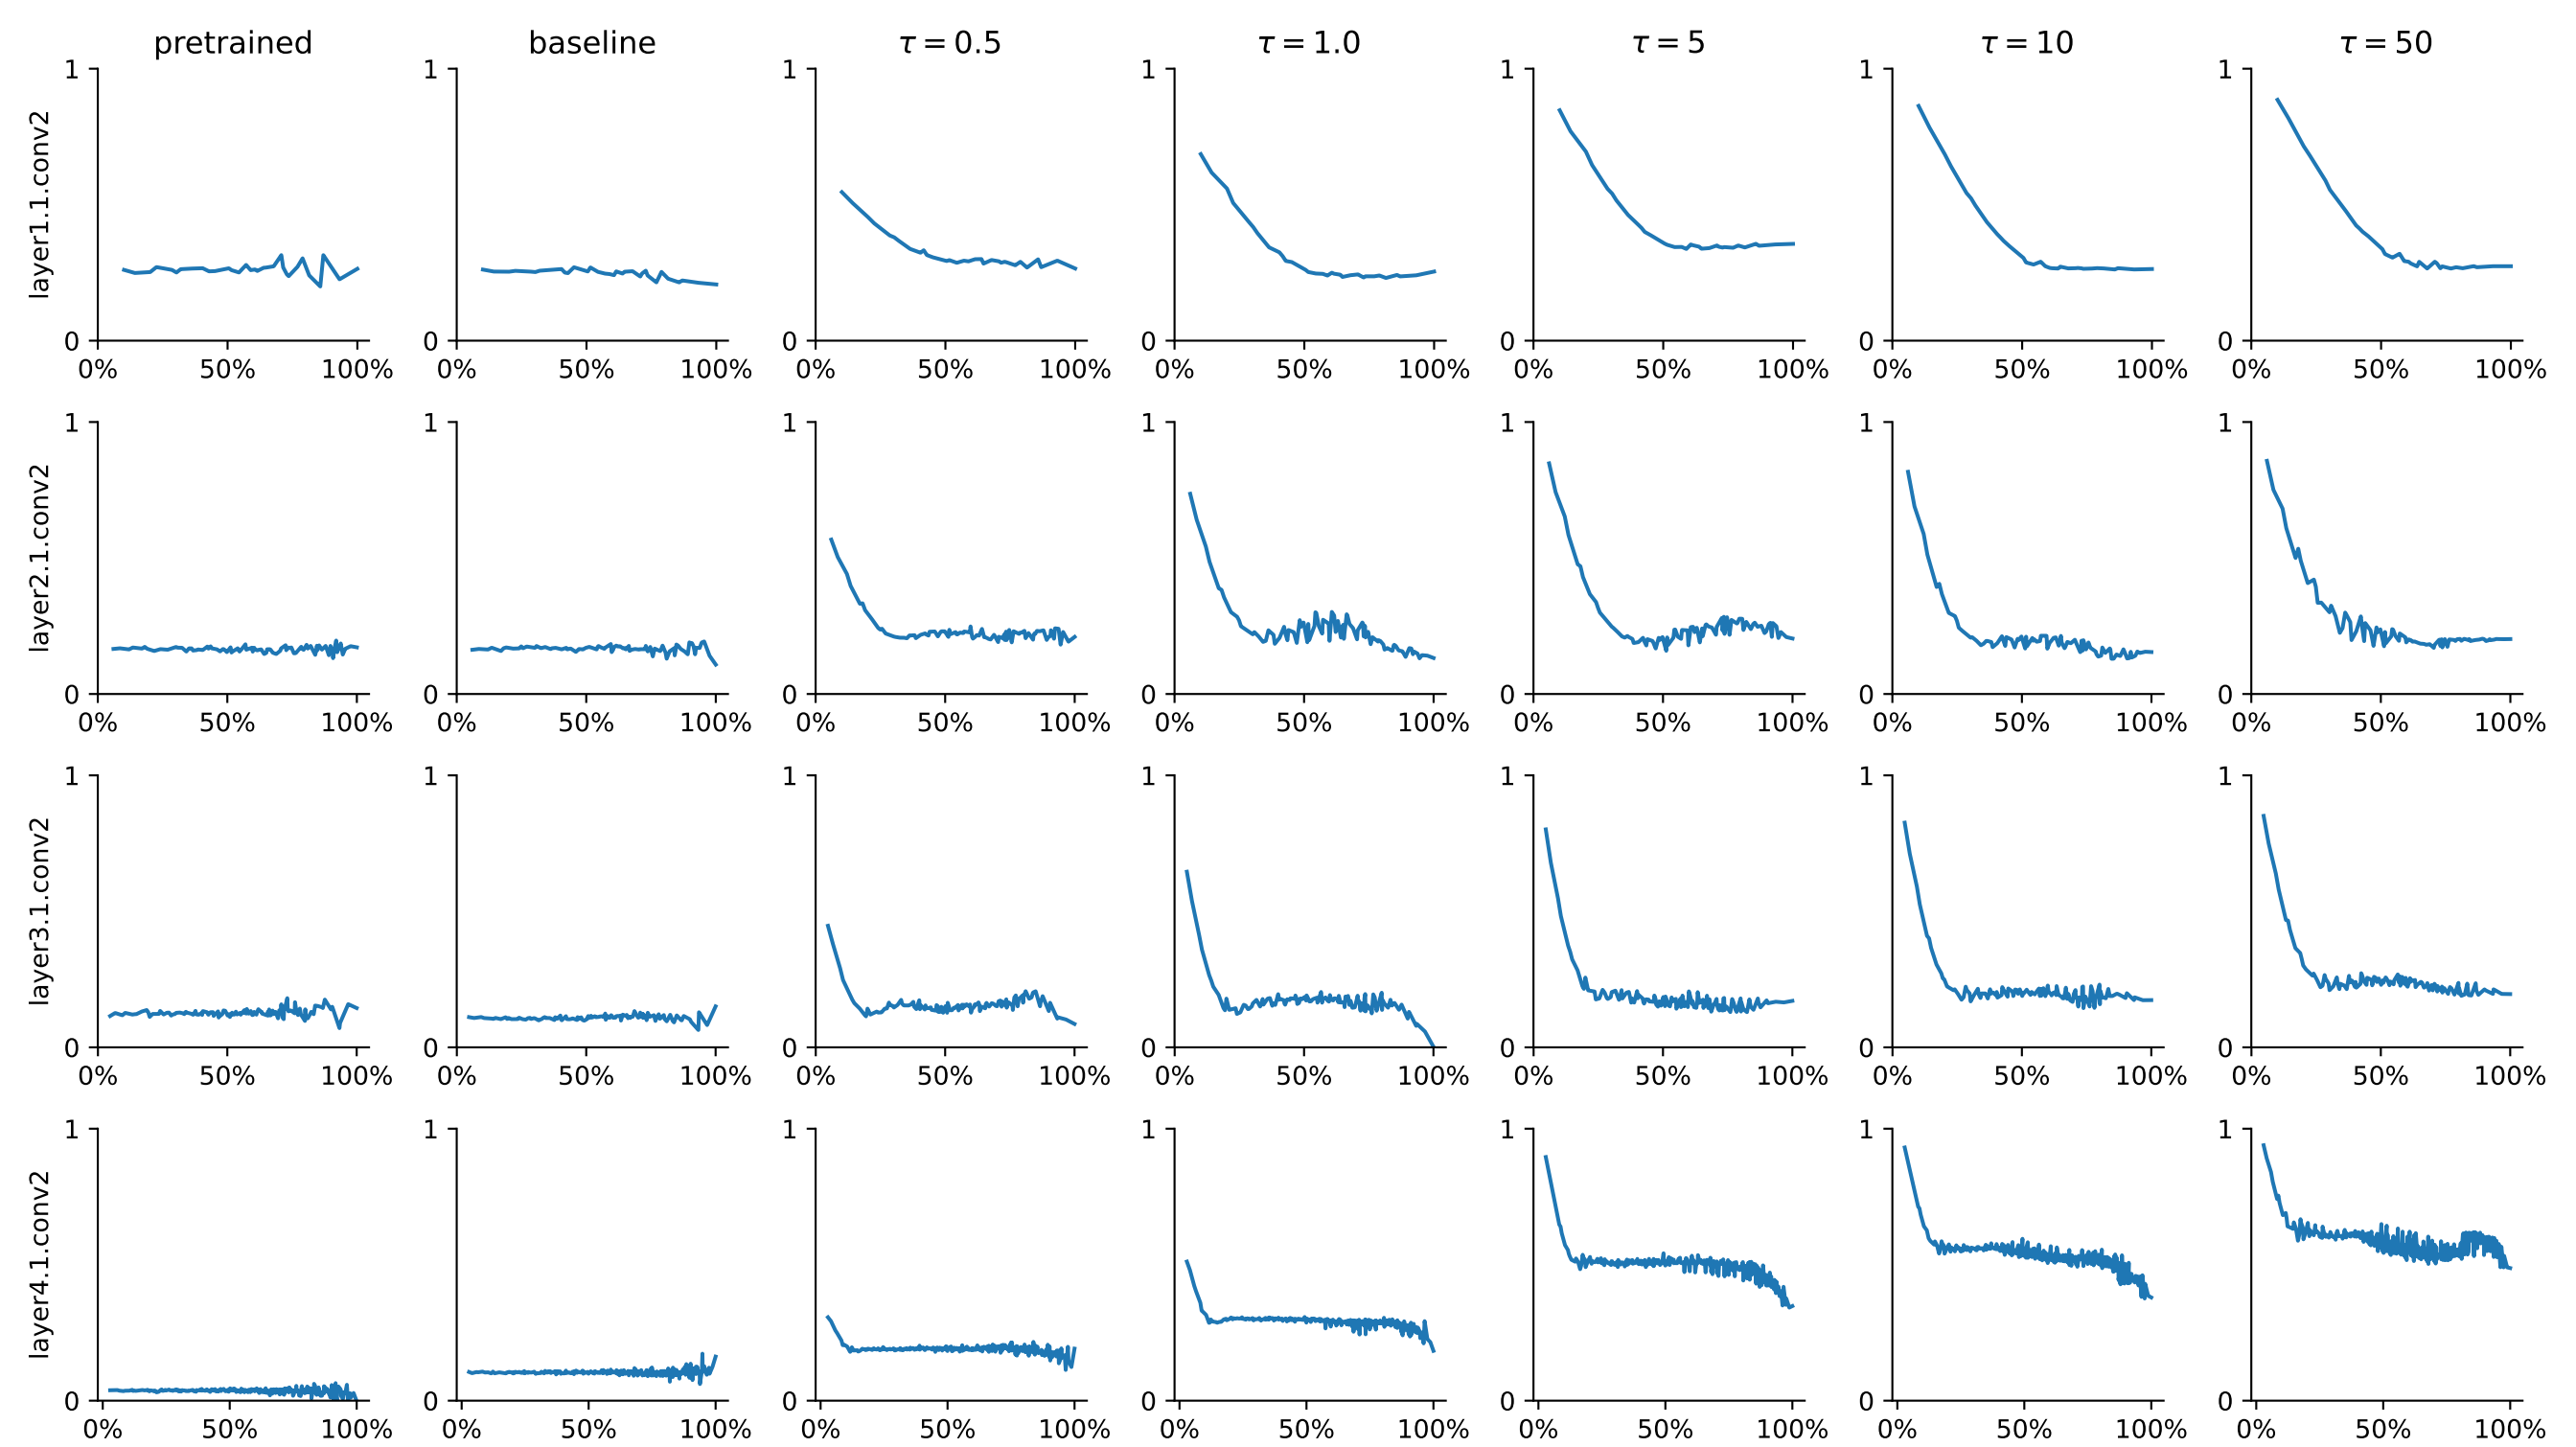

Supplement: supplementary_material [file attachment]

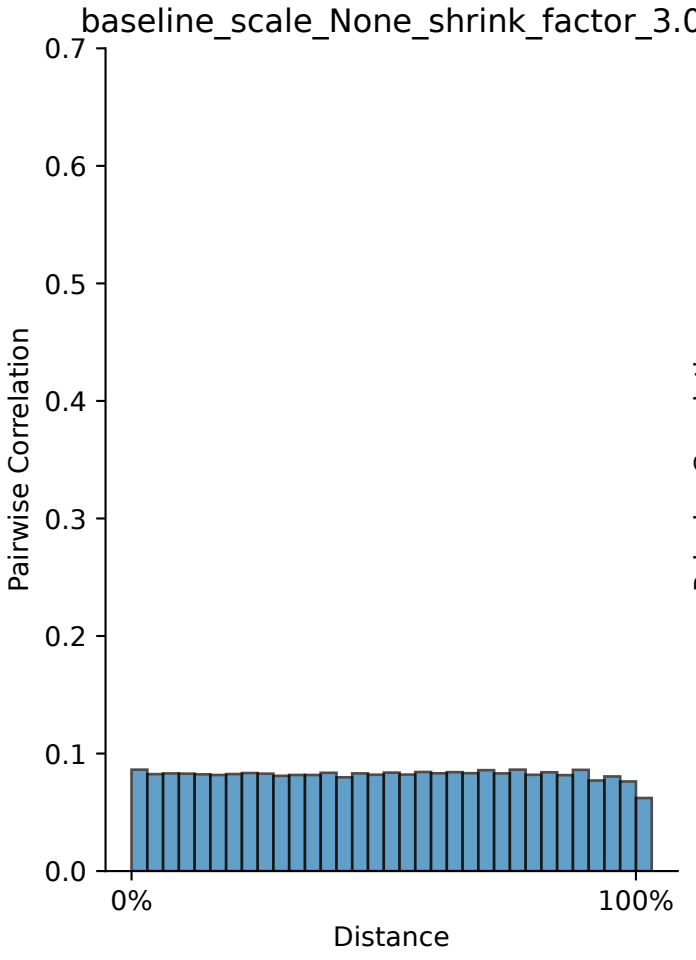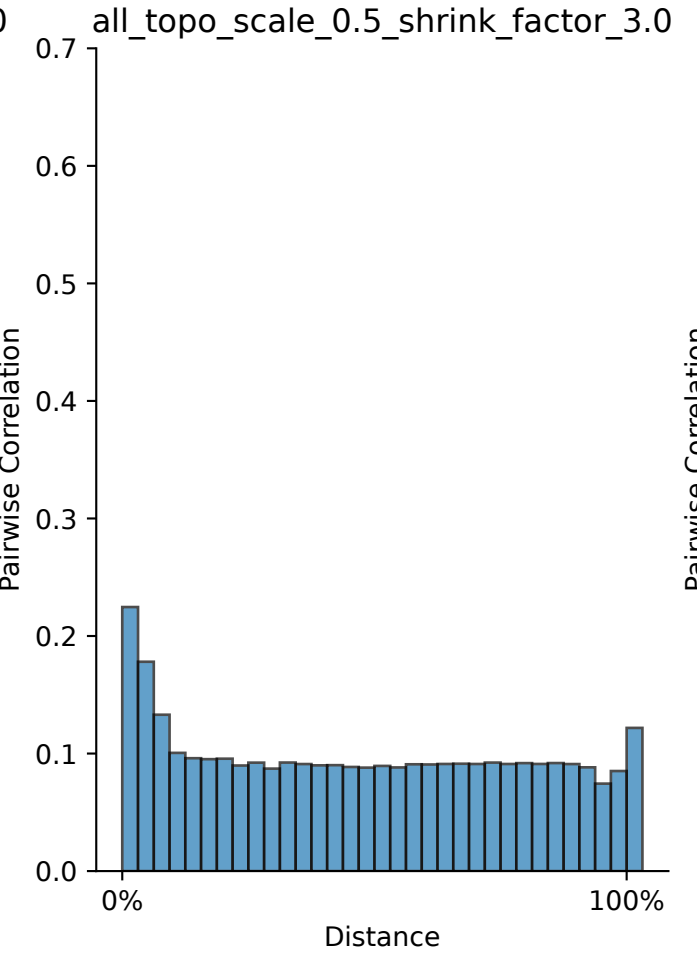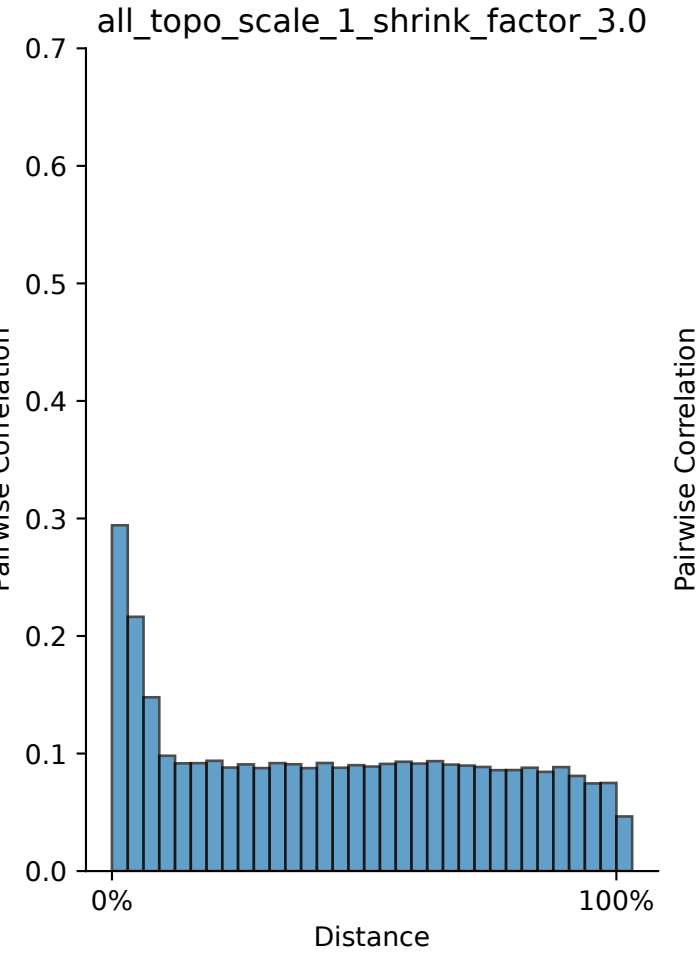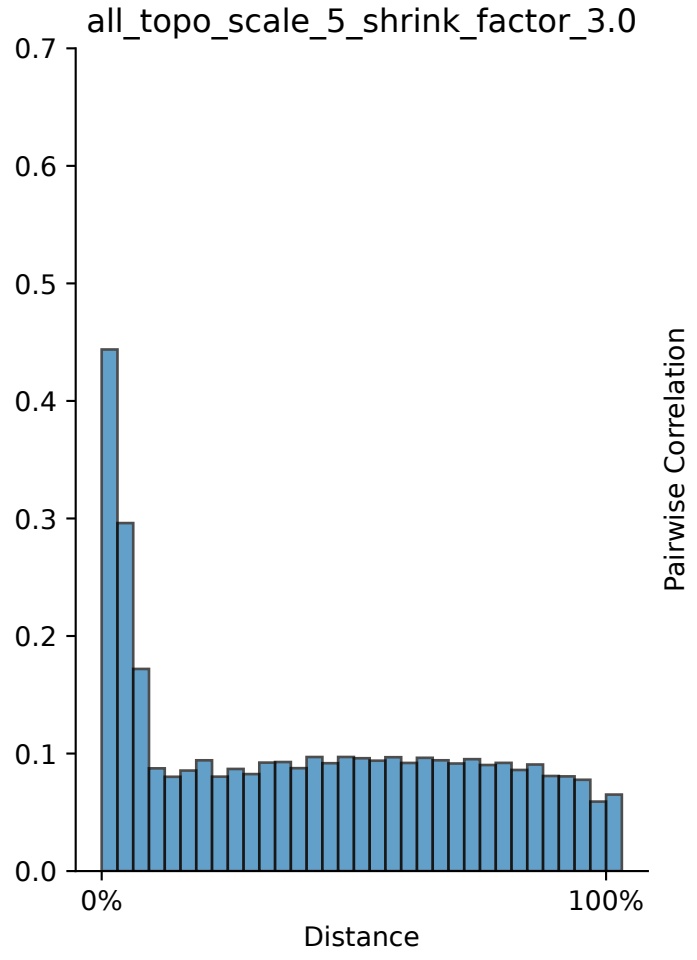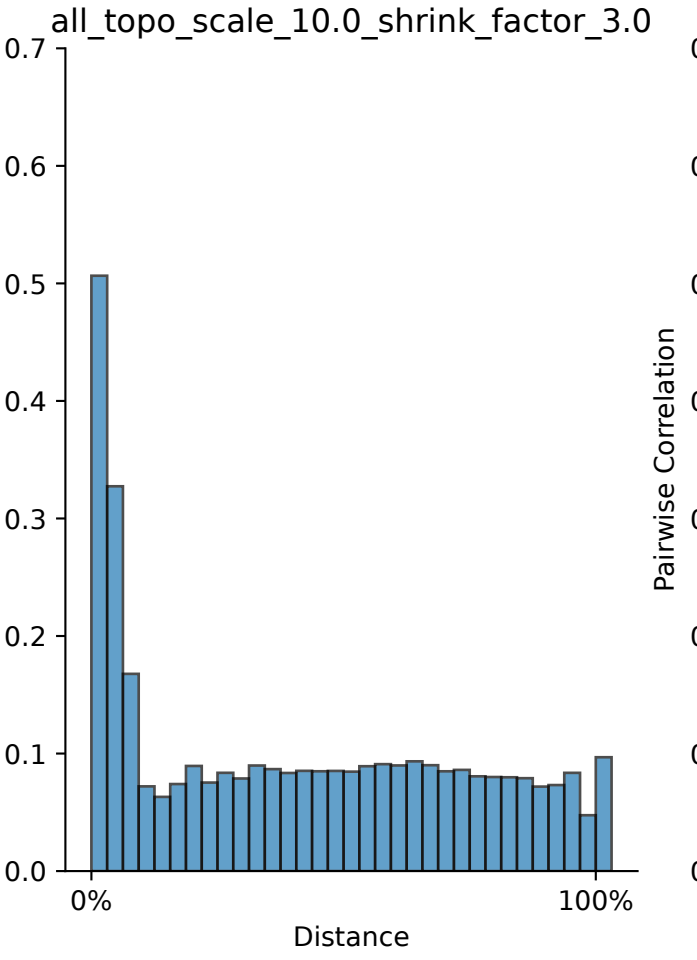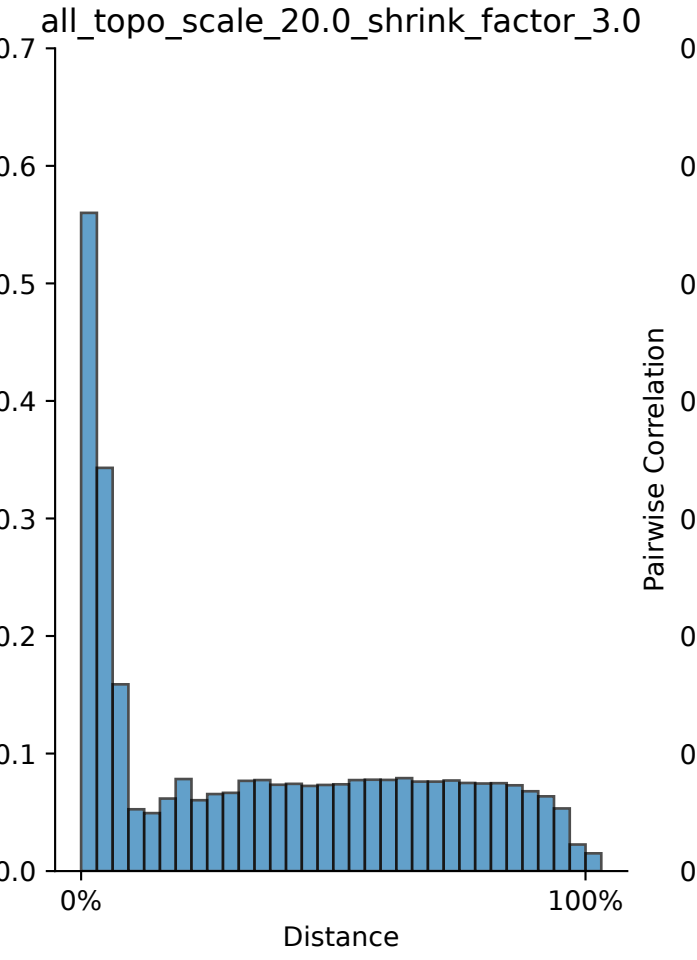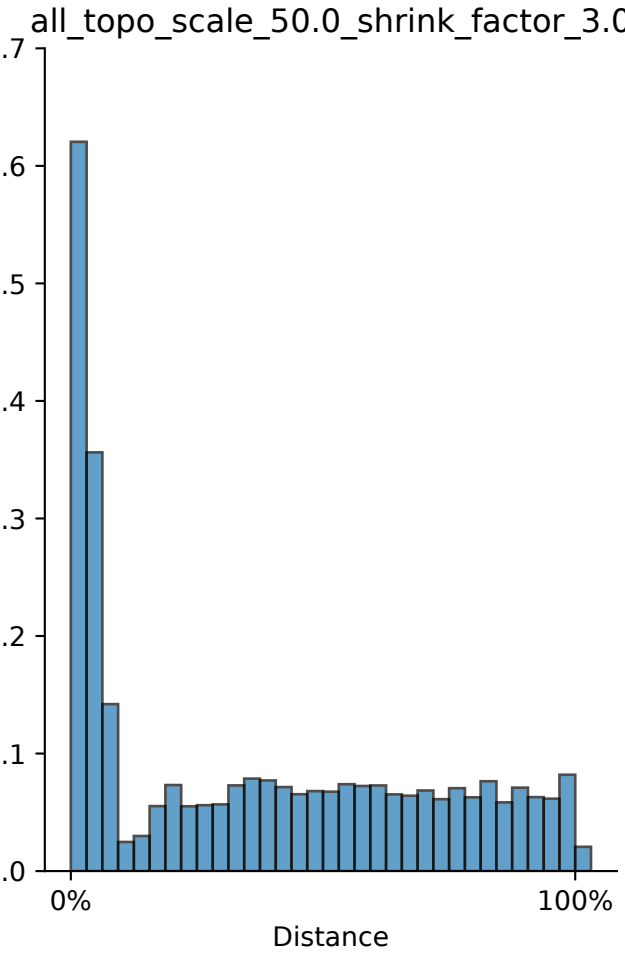

Supplement: supplementary_material [file attachment]

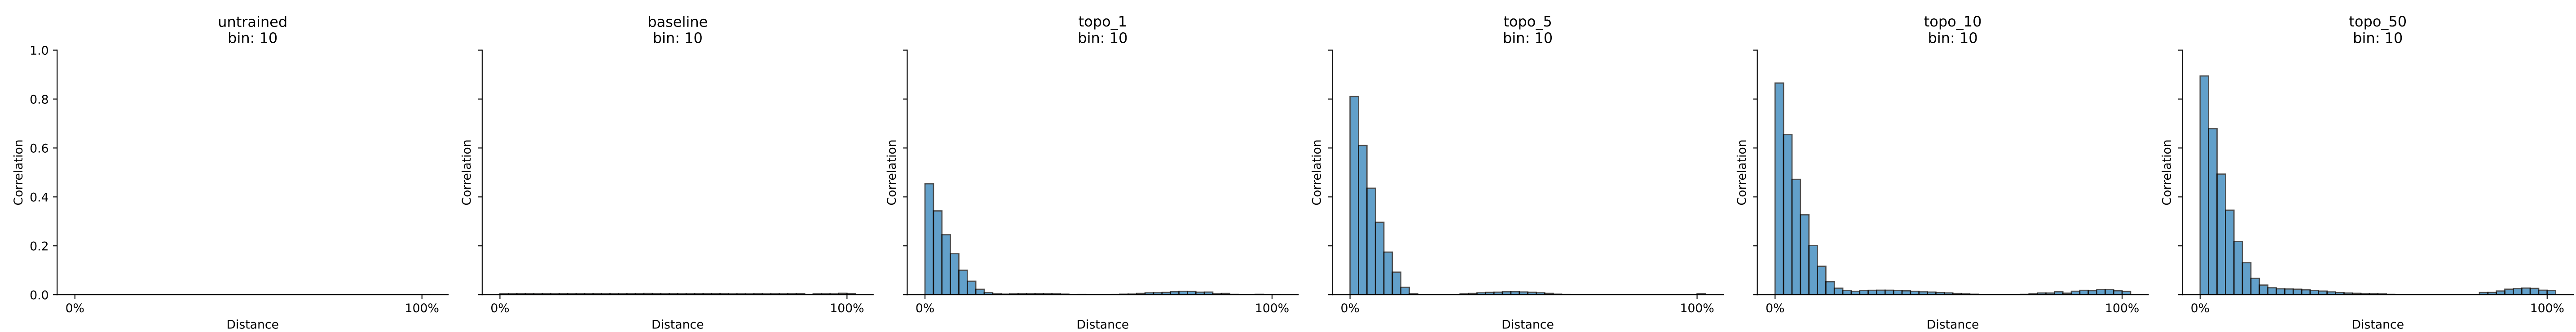

Supplement: supplementary_material [file attachment]

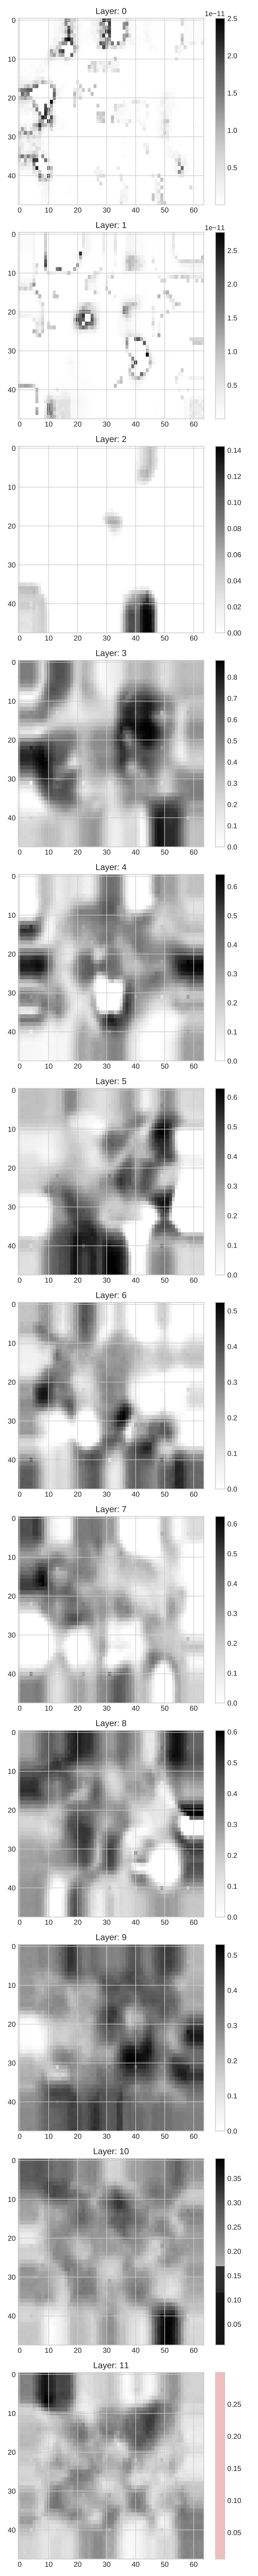

Supplement: supplementary_material [file attachment]

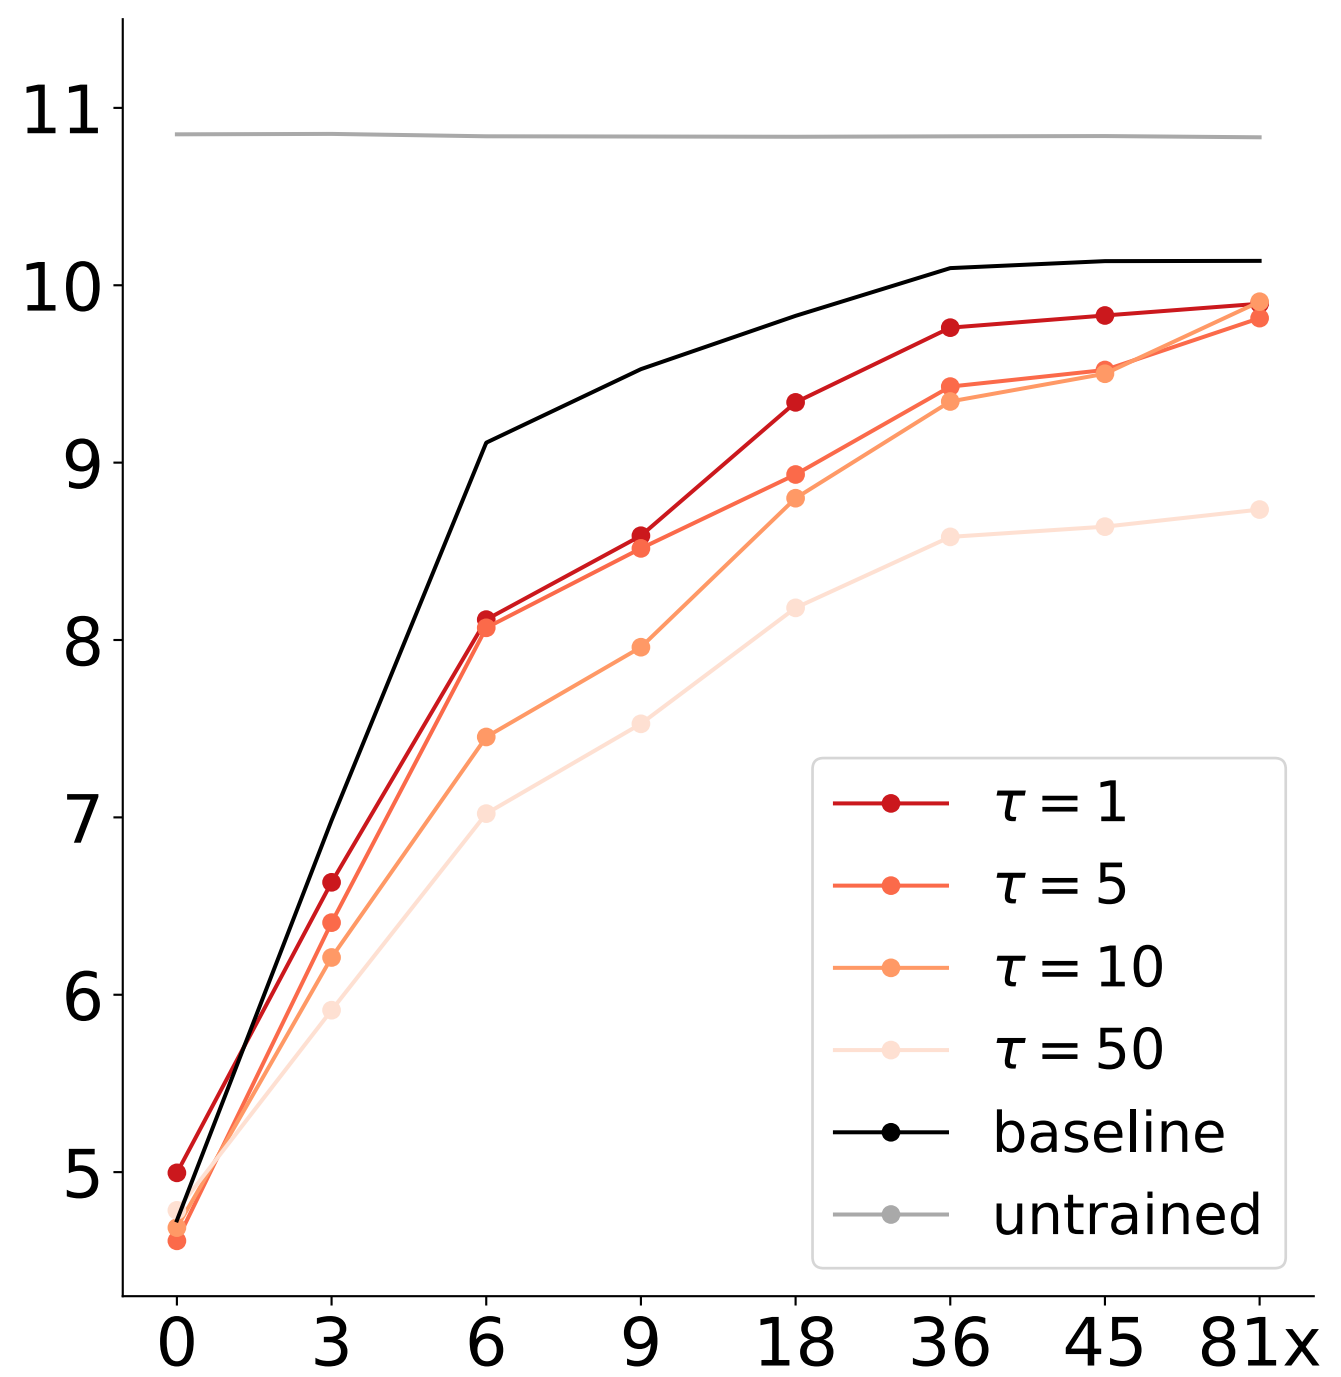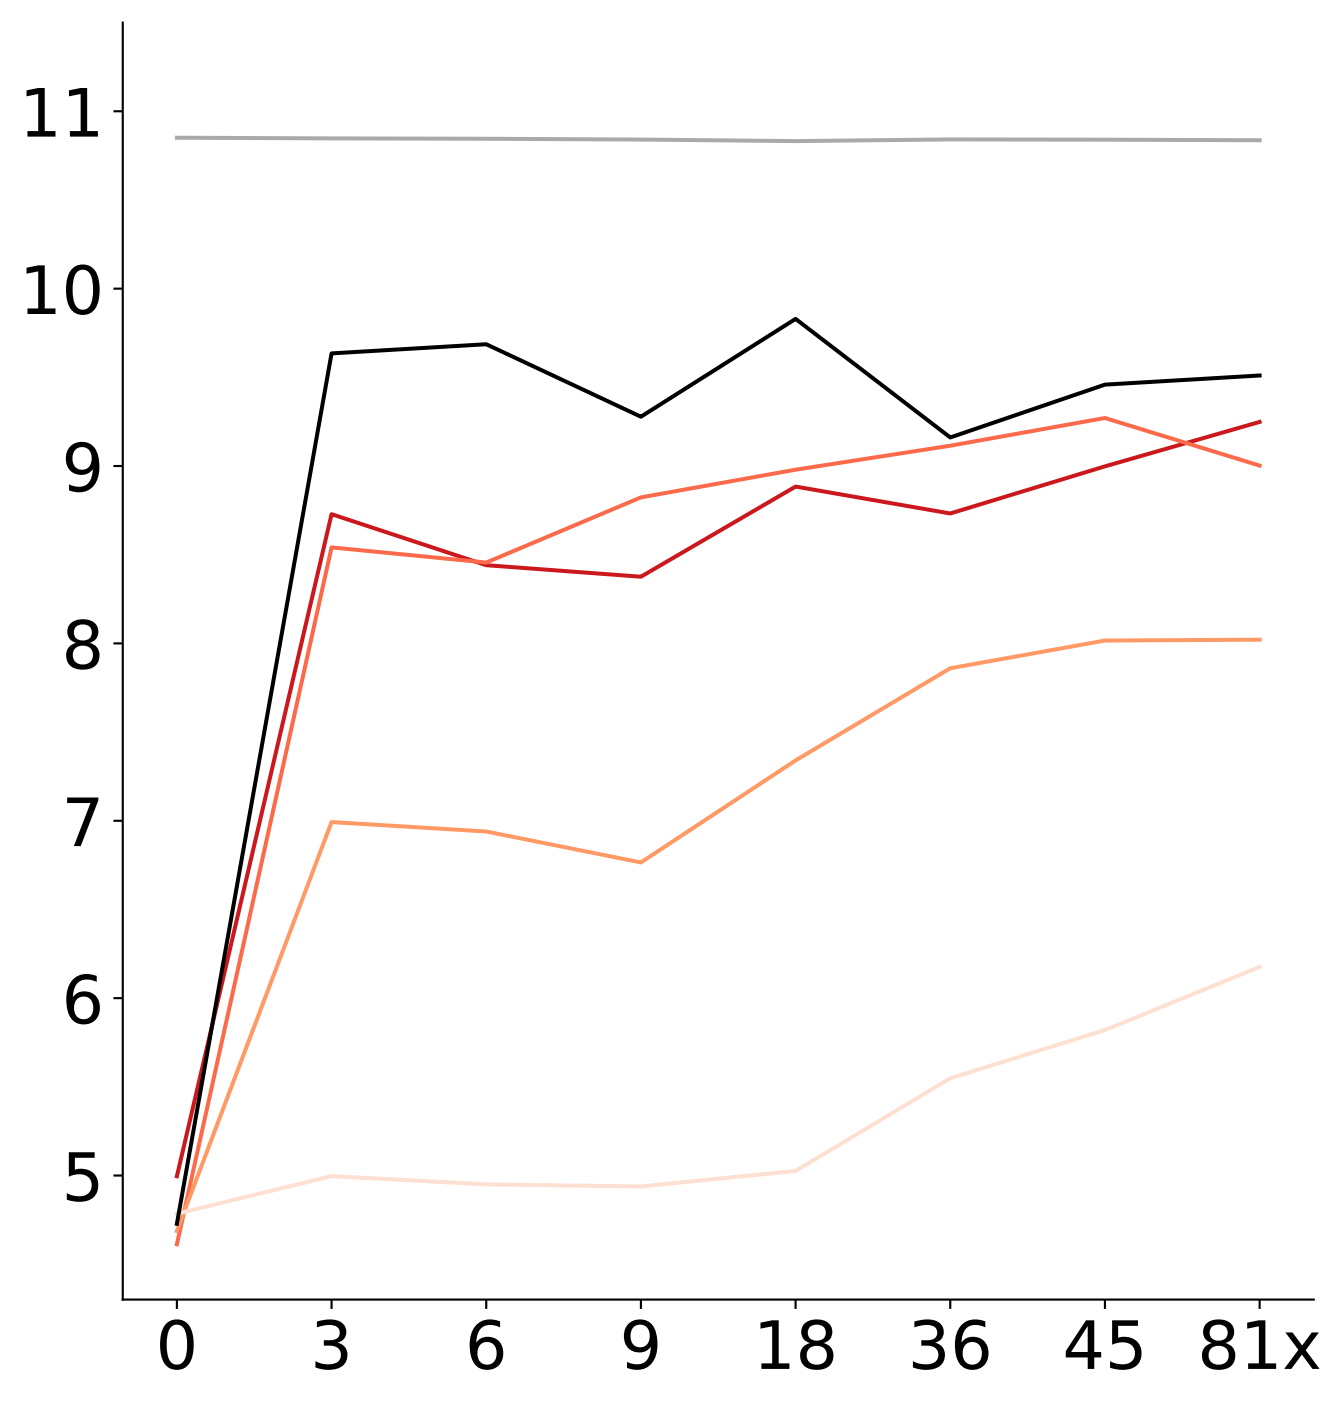

Supplement: supplementary_material [file attachment]

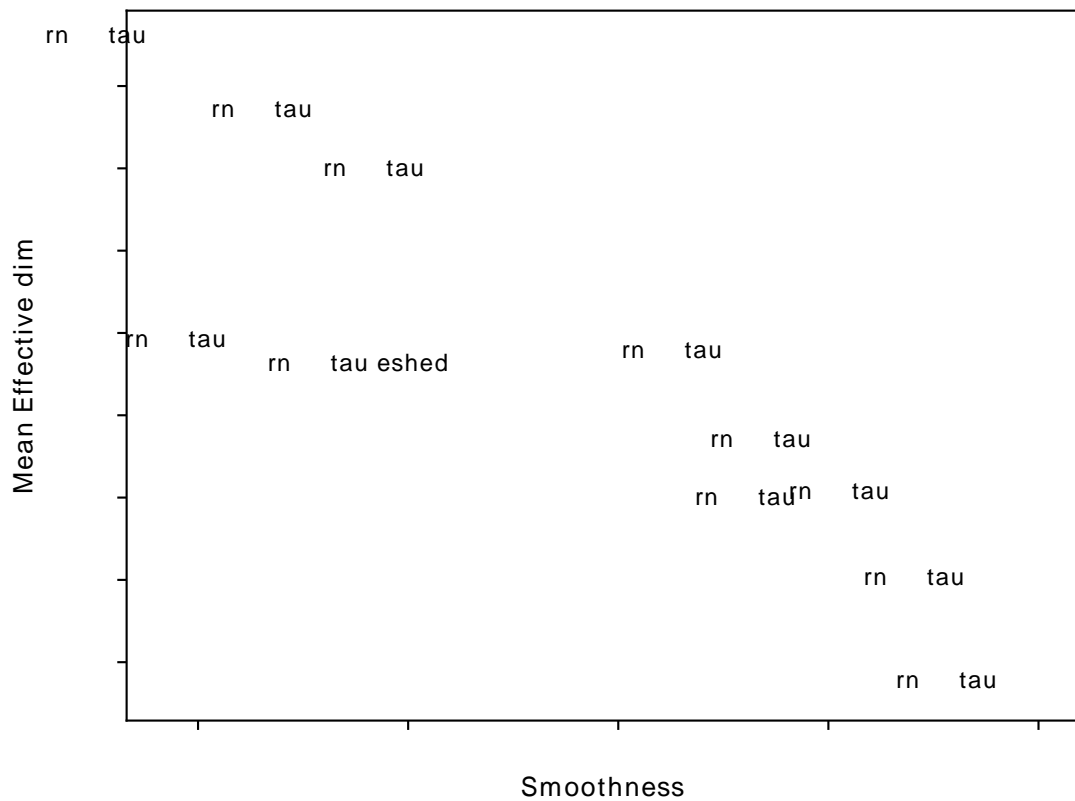

Supplement: supplementary_material [file attachment]

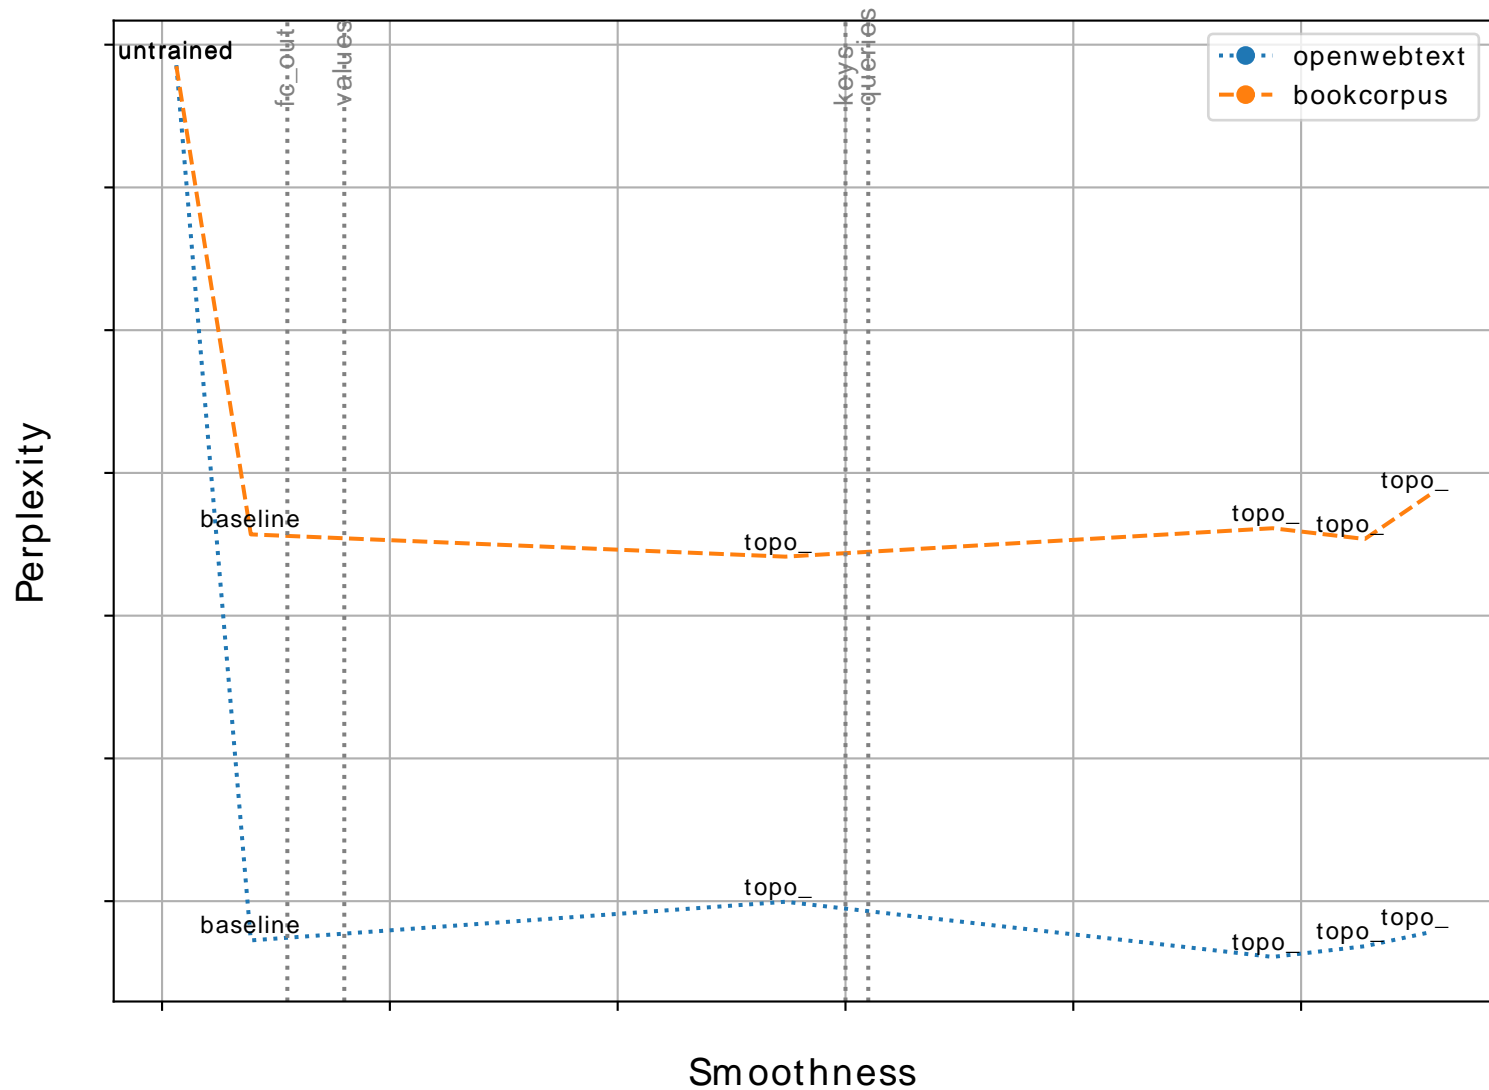

Supplement: supplementary_material [file attachment]

All Topo

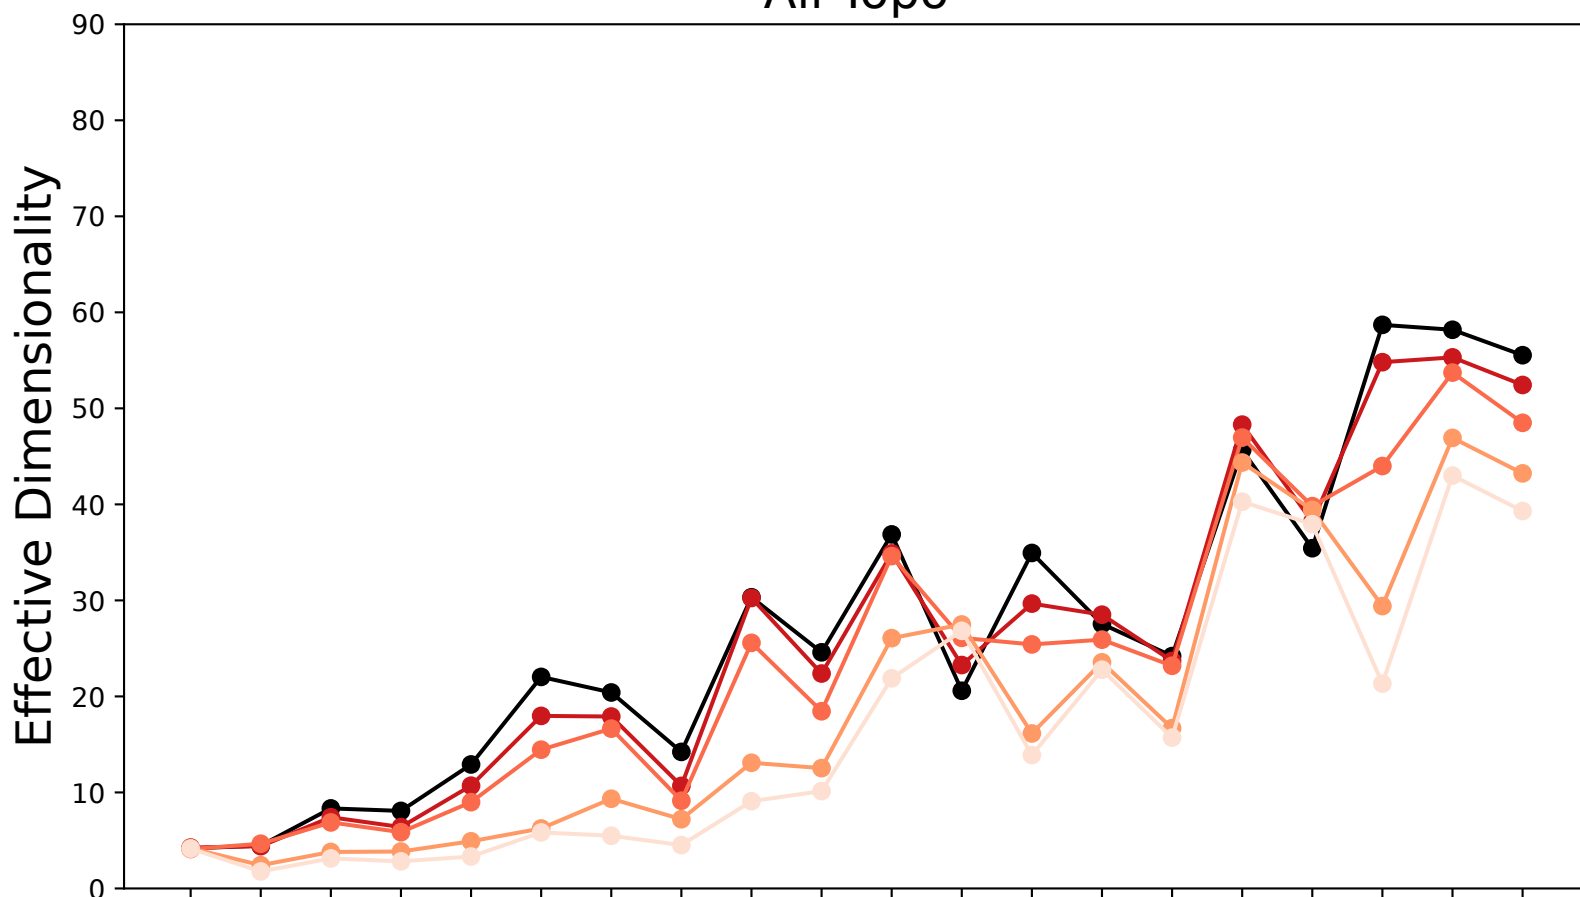

End Topo

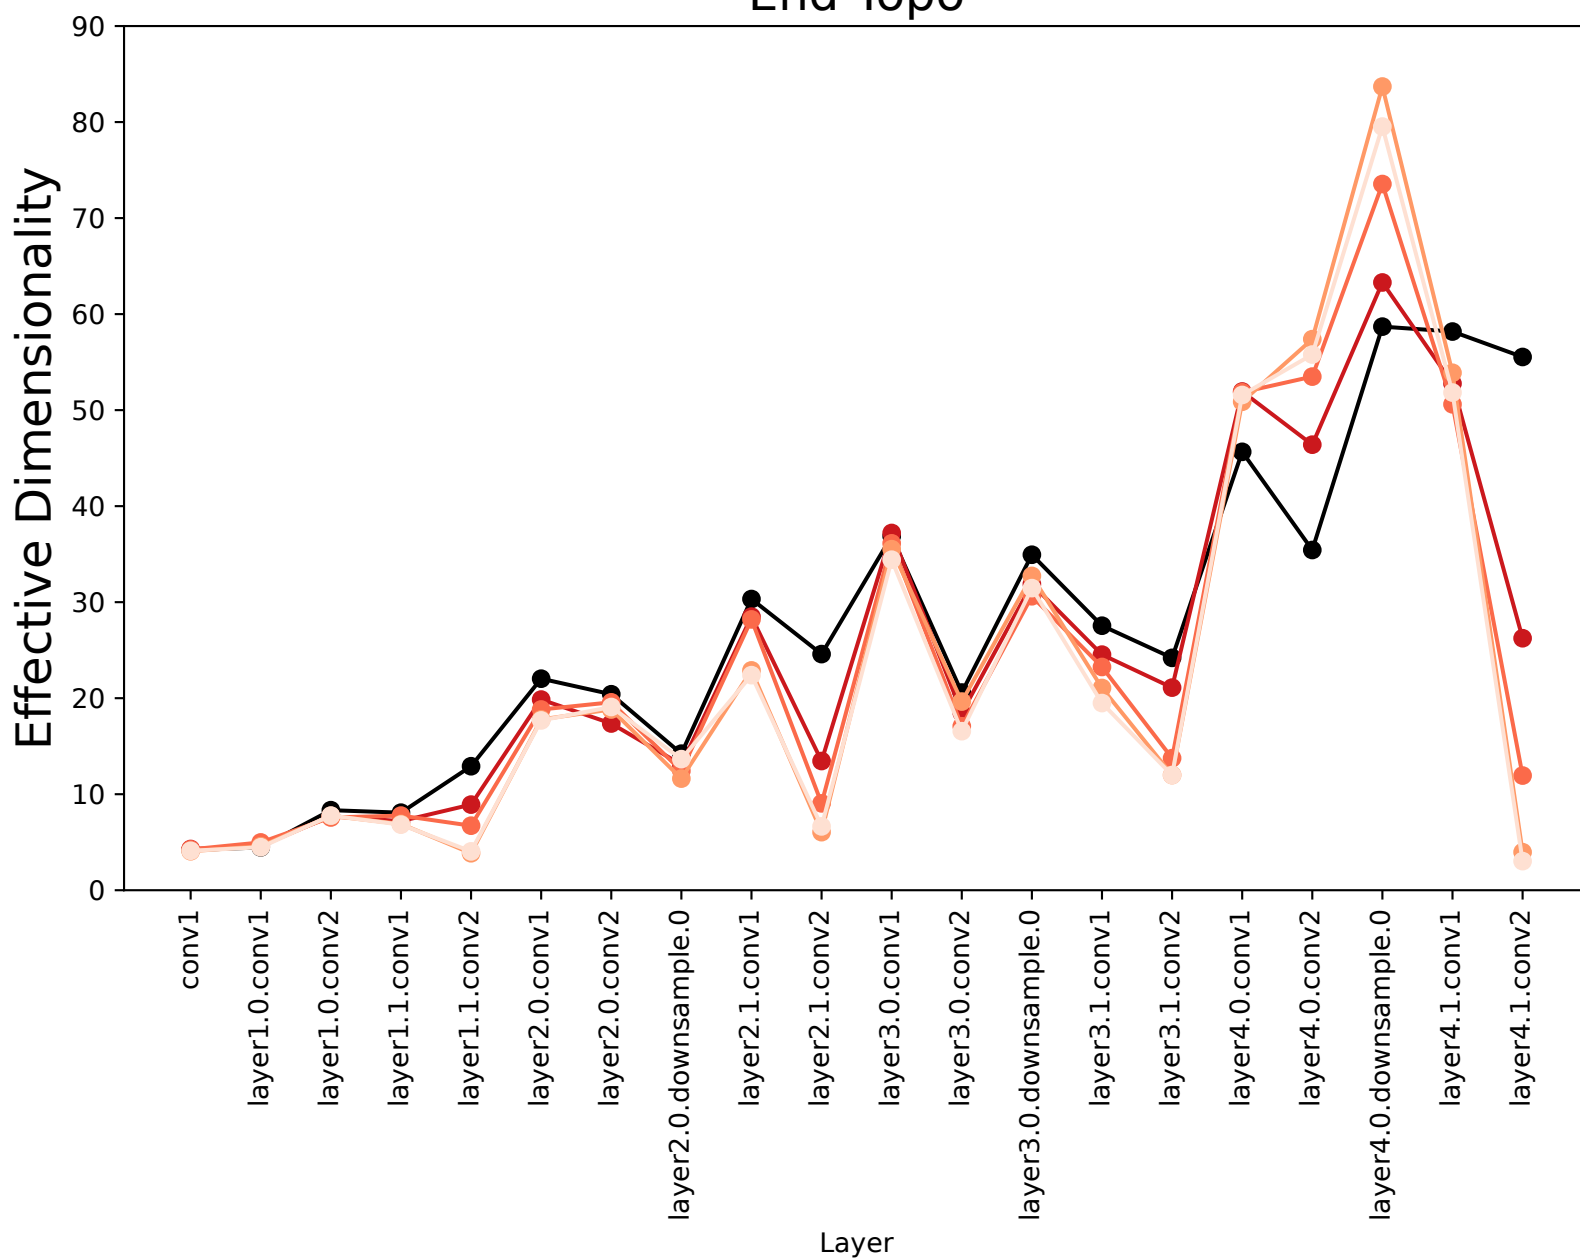

Supplement: supplementary_material [file attachment]

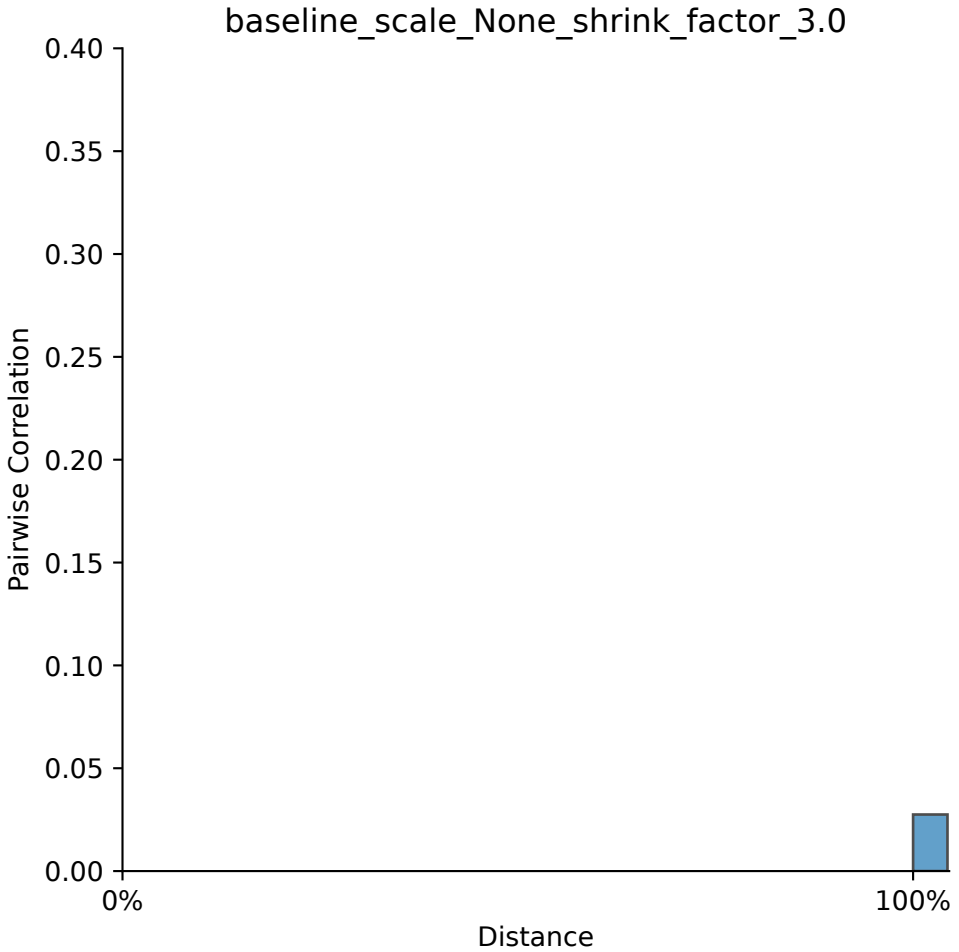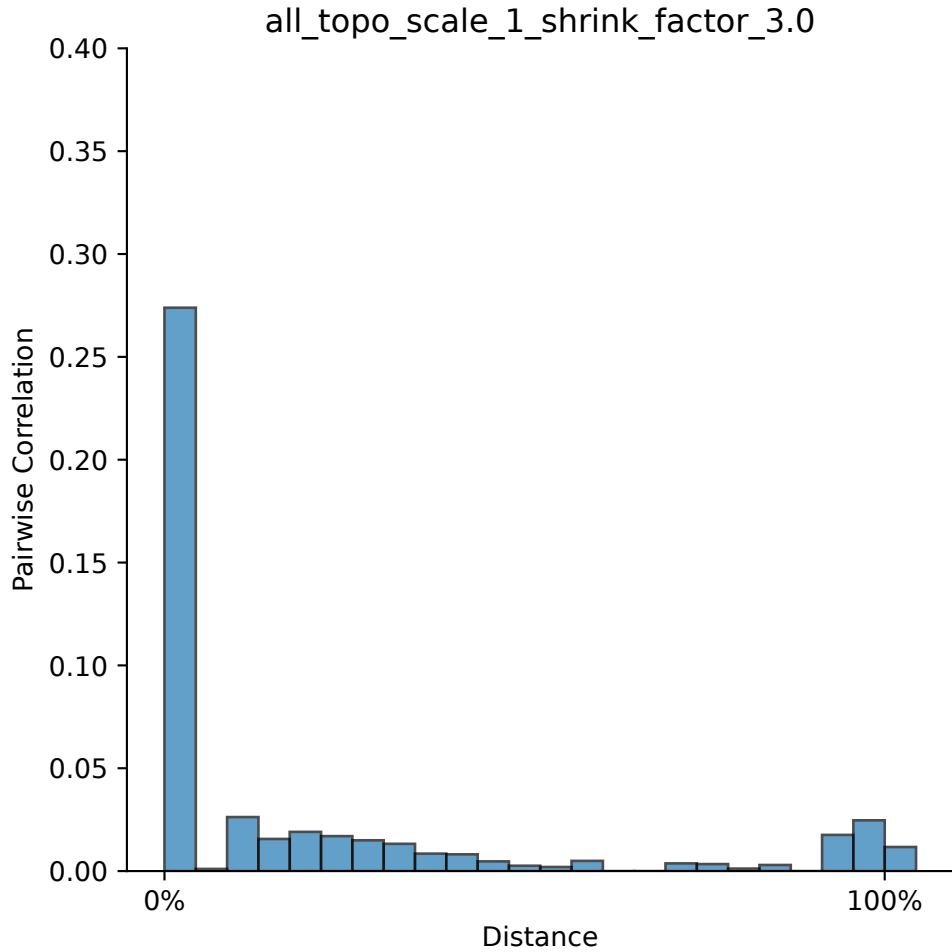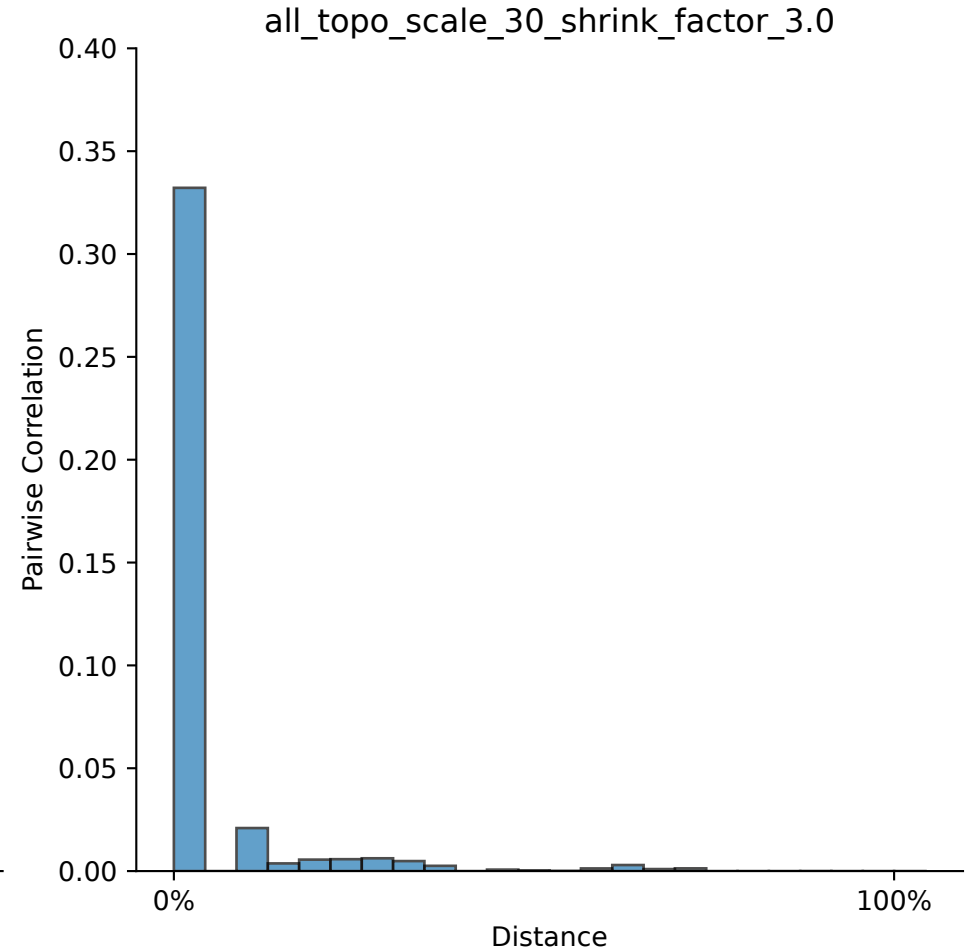

Supplement: supplementary_material [file attachment]

Drop in Validation Accuracy L1 Sparsity rn18

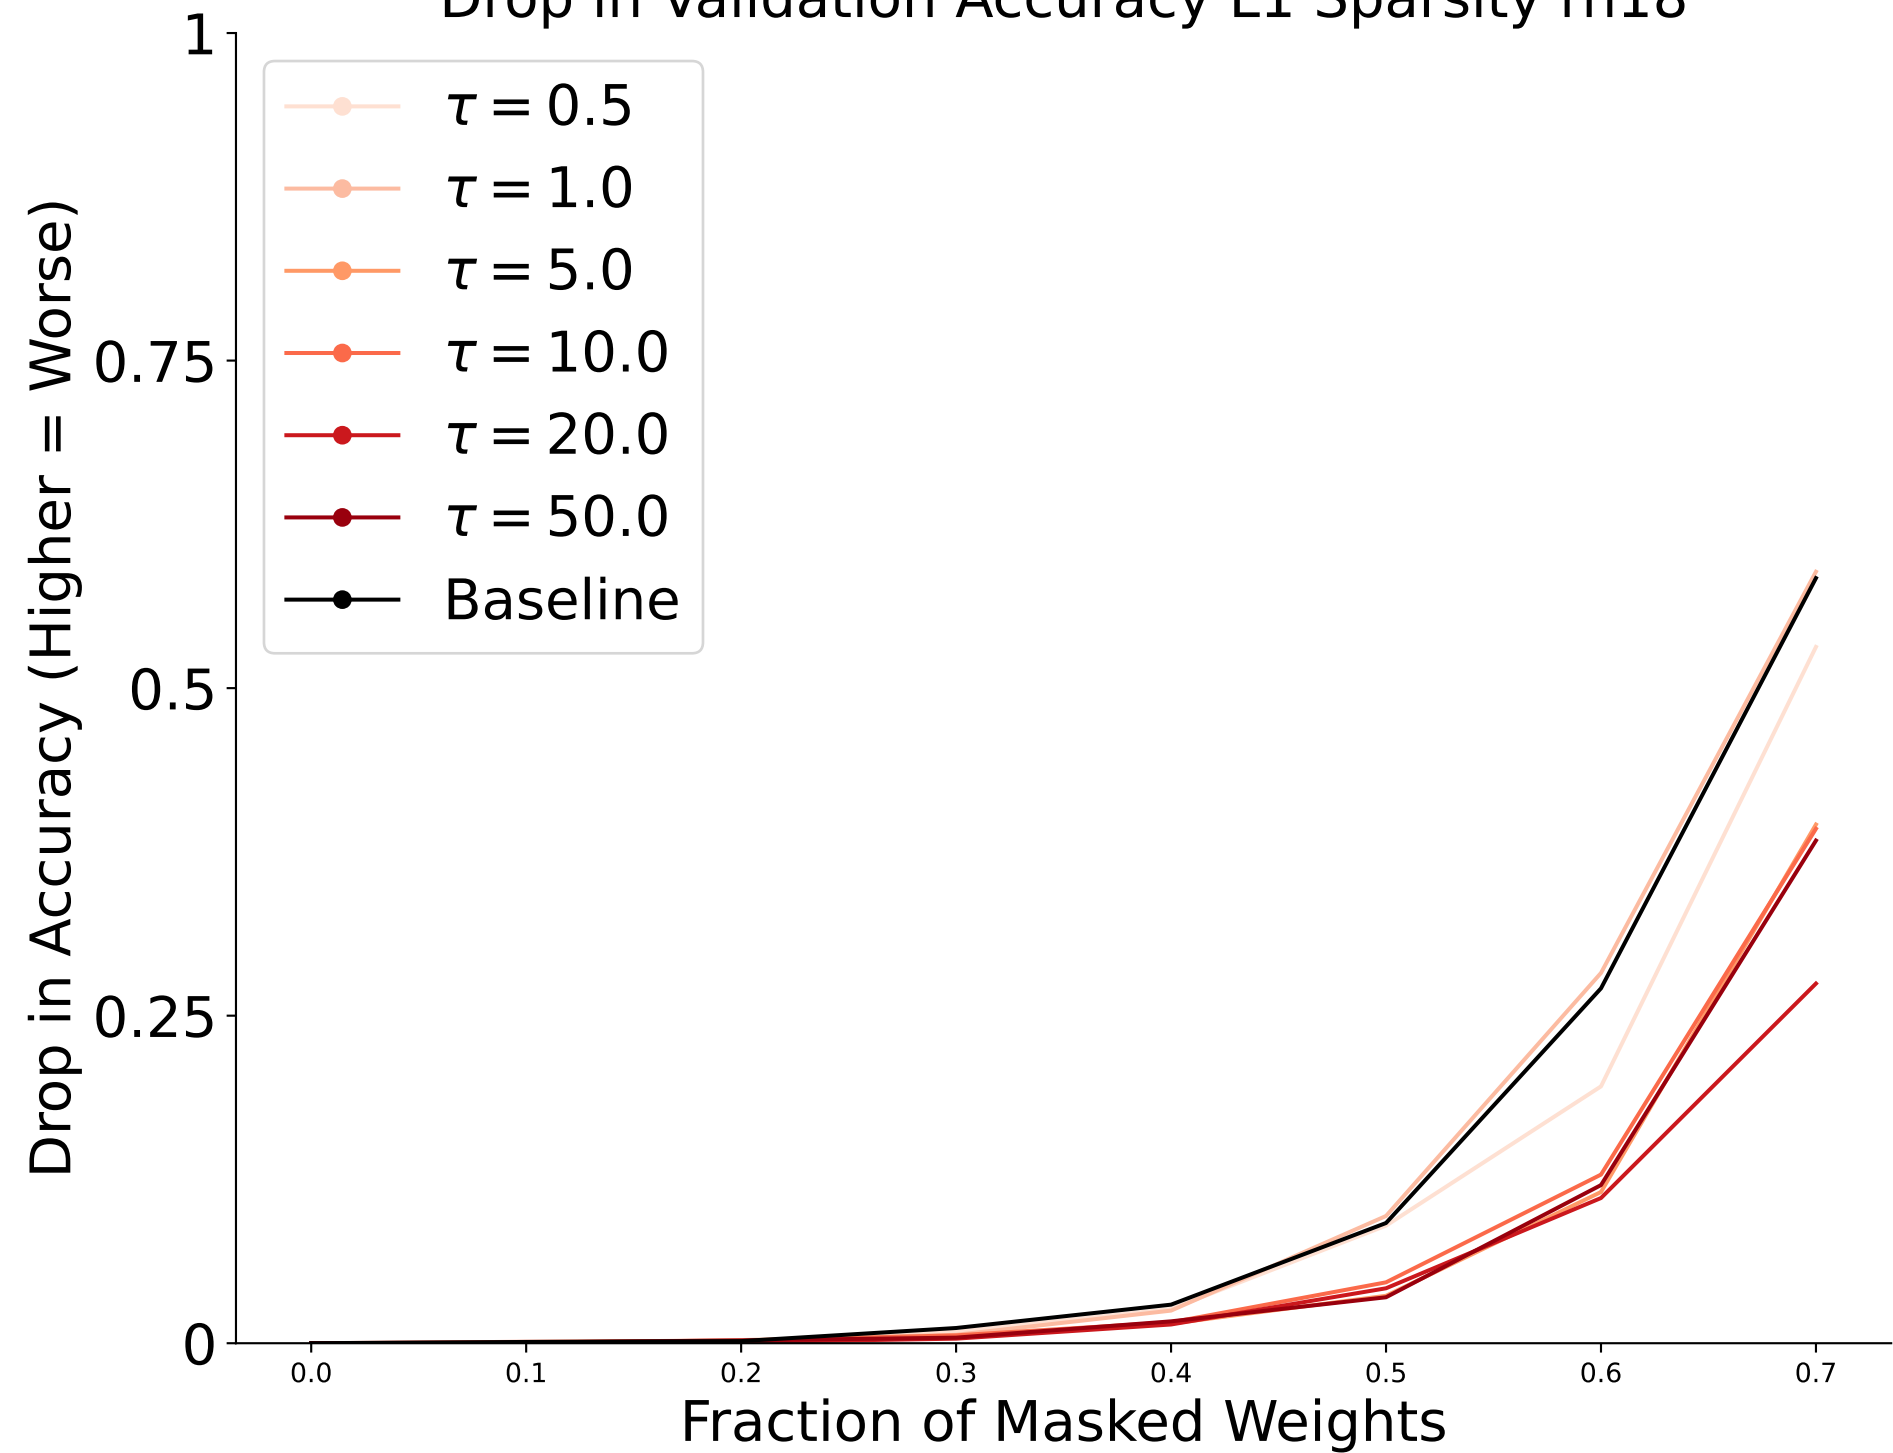

Supplement: supplementary_material [file attachment]

all topo sparsify all (l1)

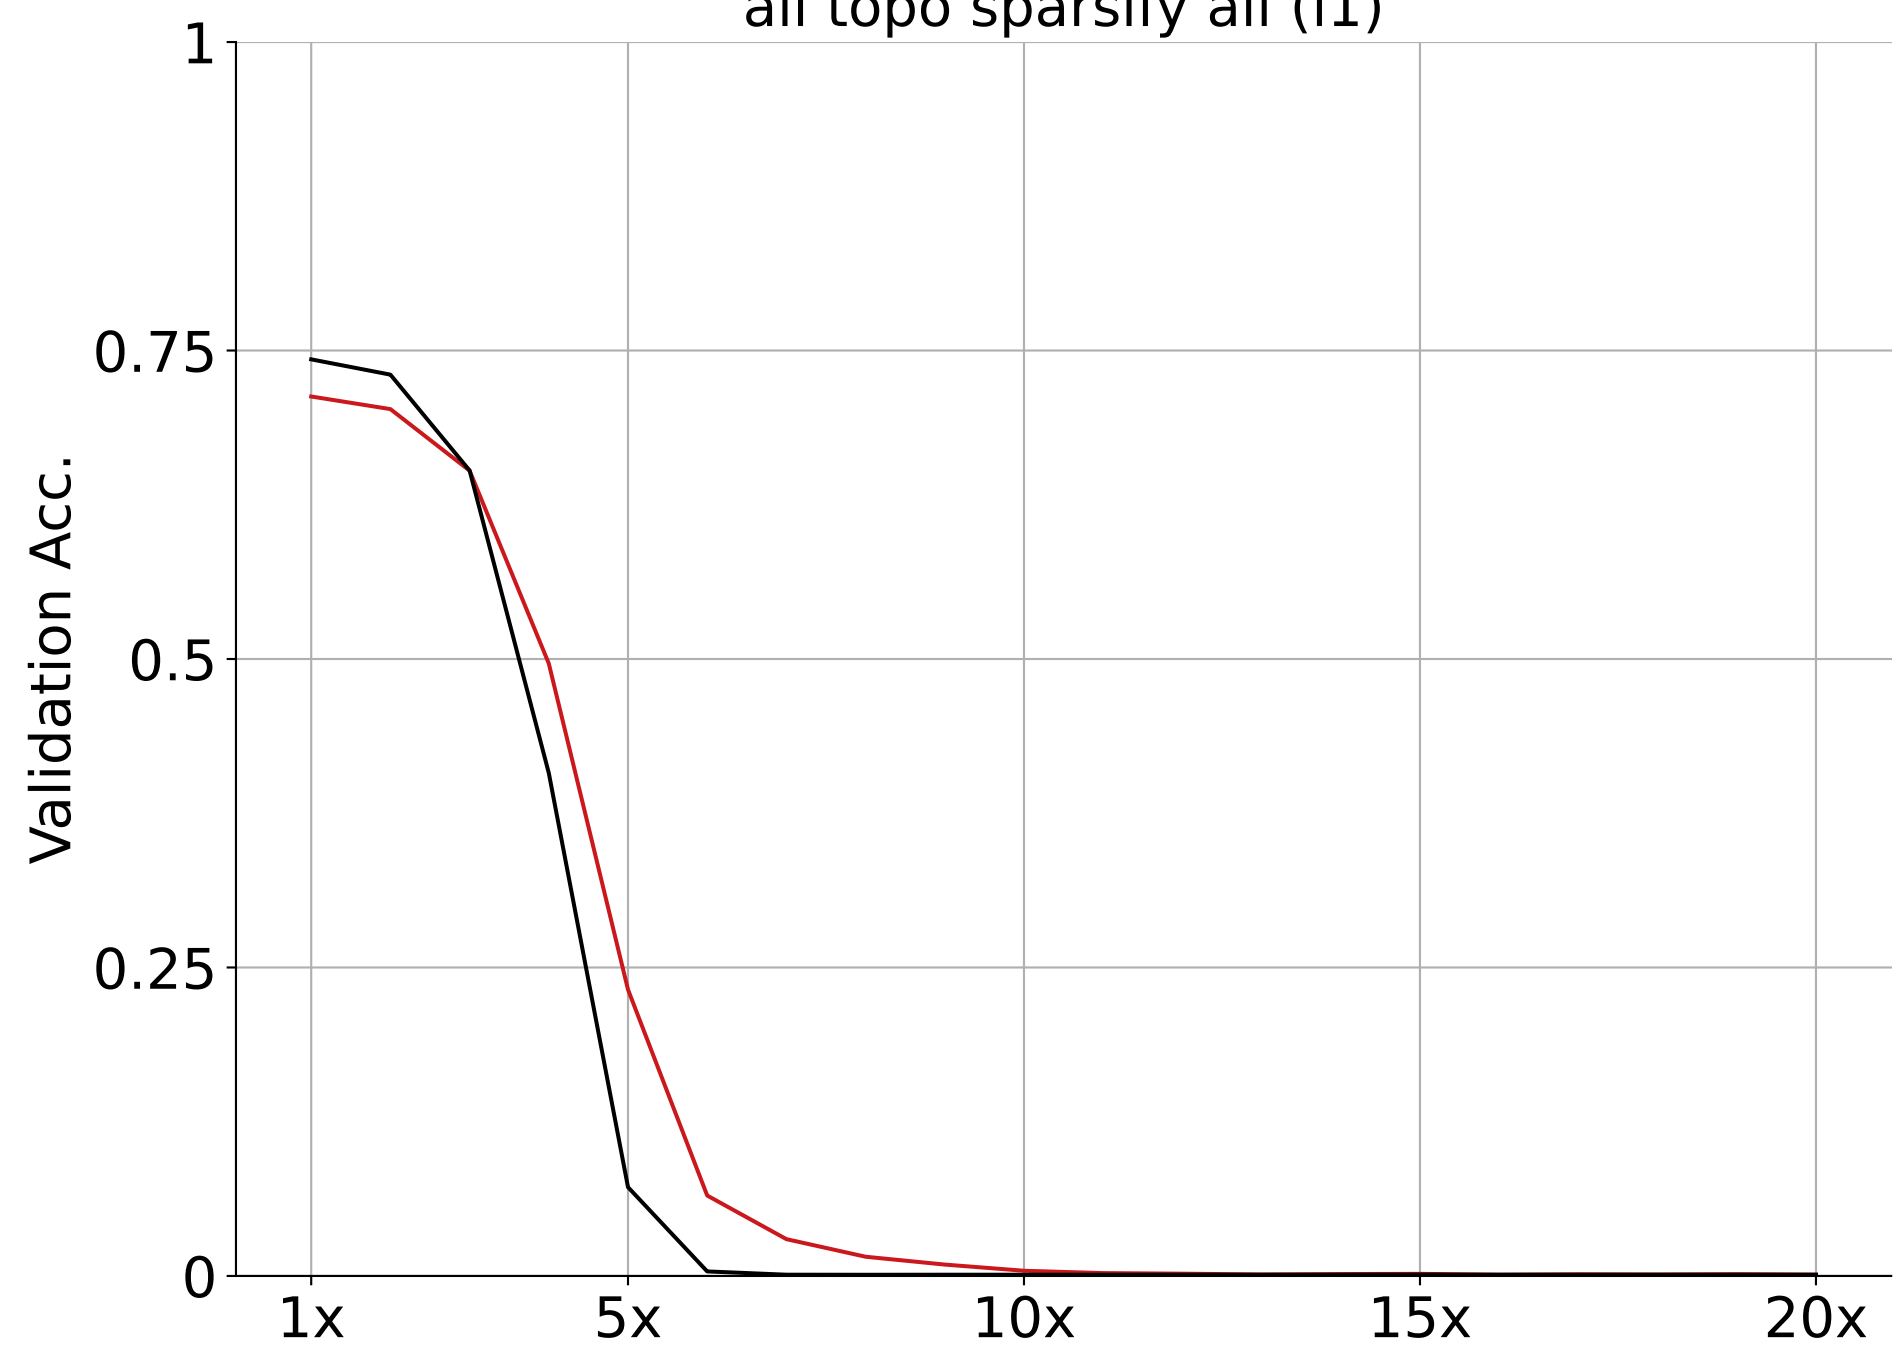

all topo sparsify all (downsampling)

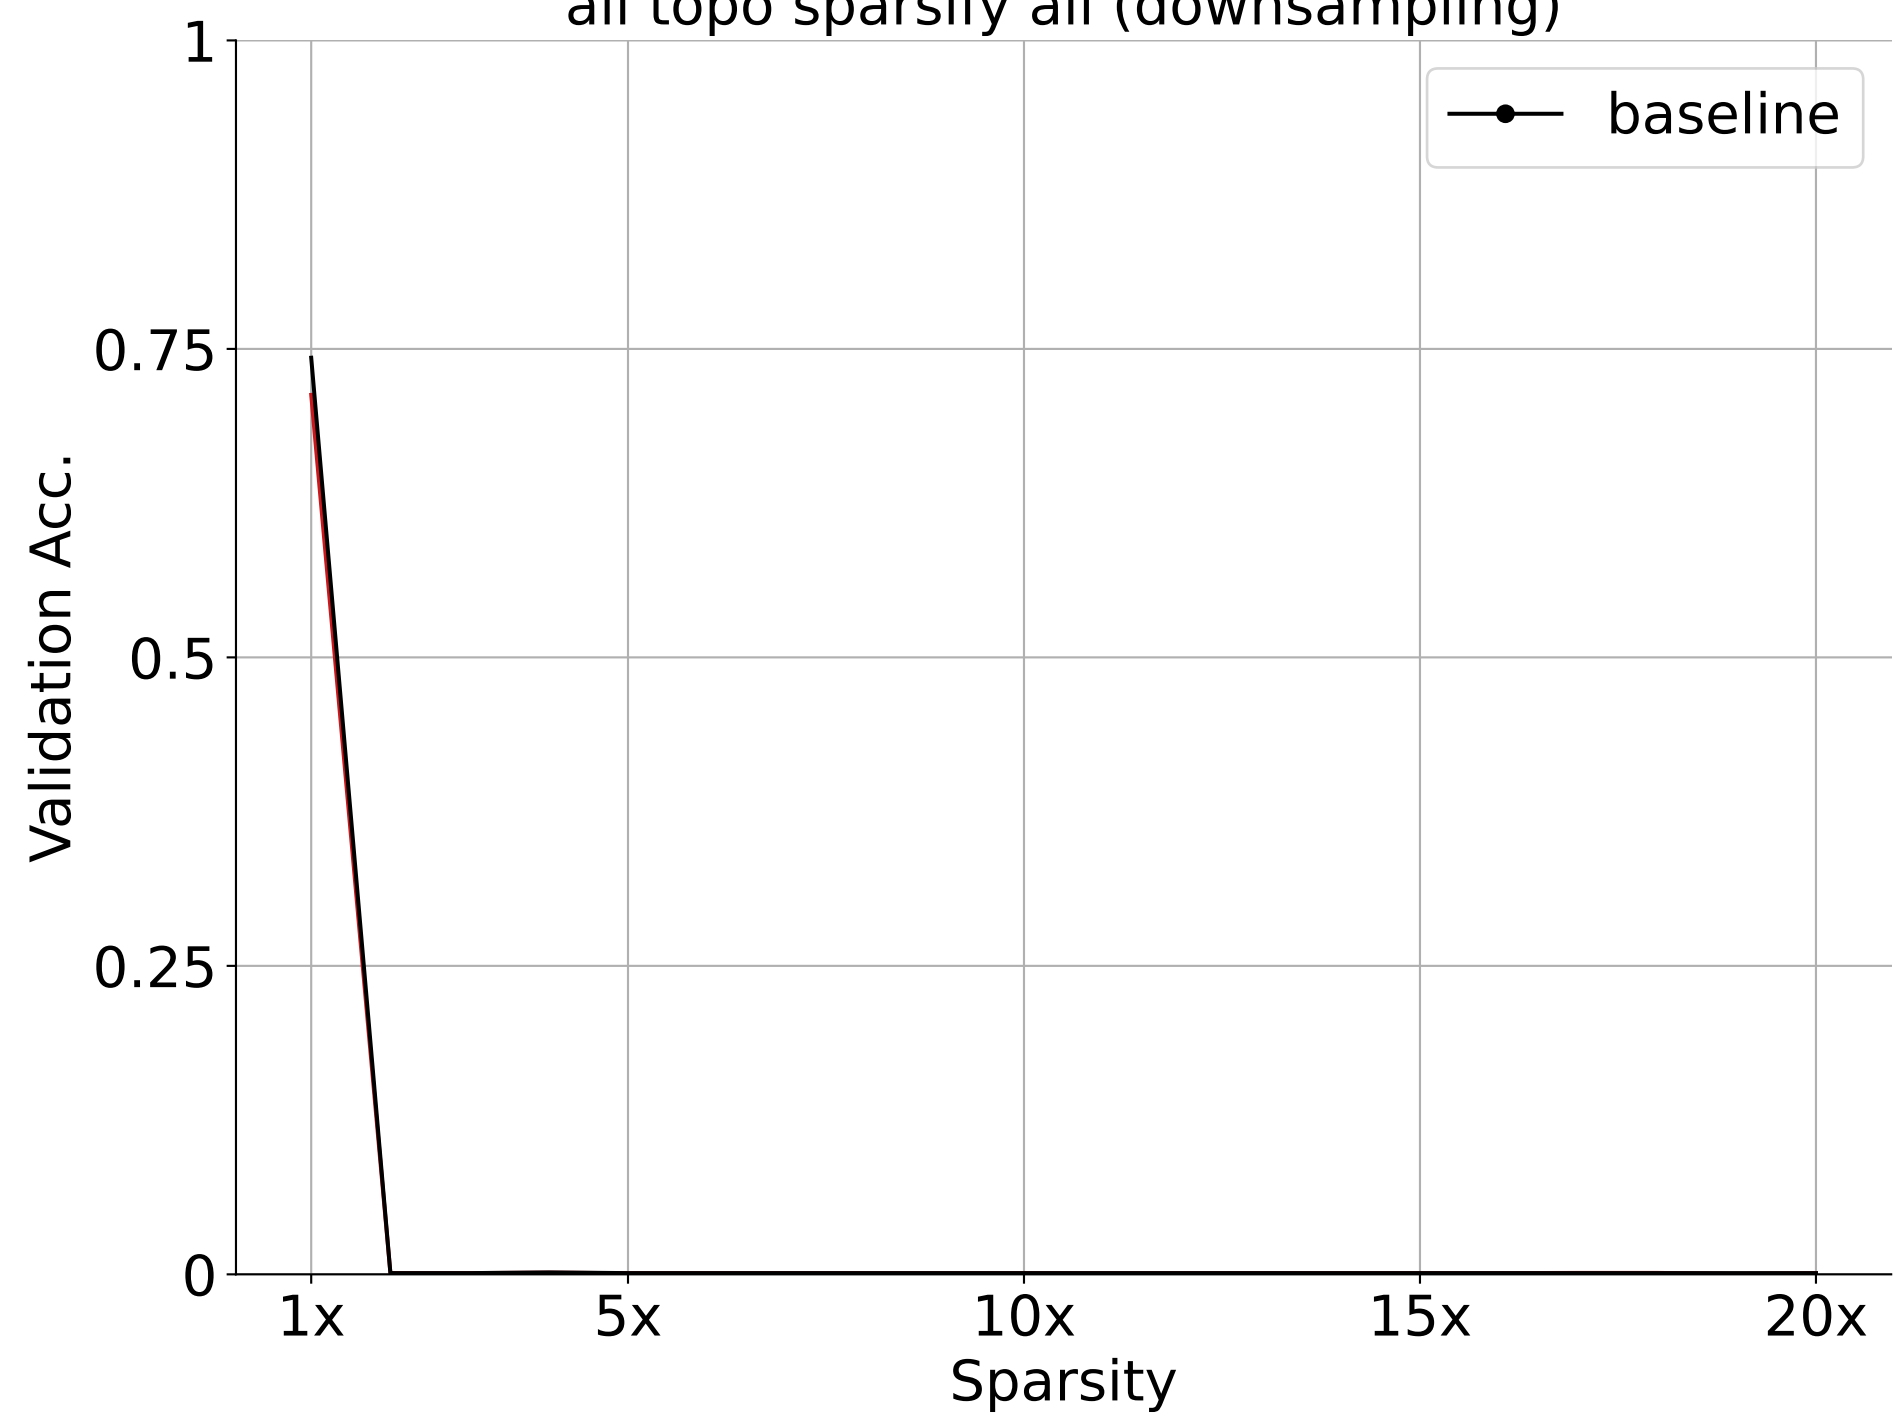

Supplement: supplementary_material [file attachment]

end topo sparsify end (l1)

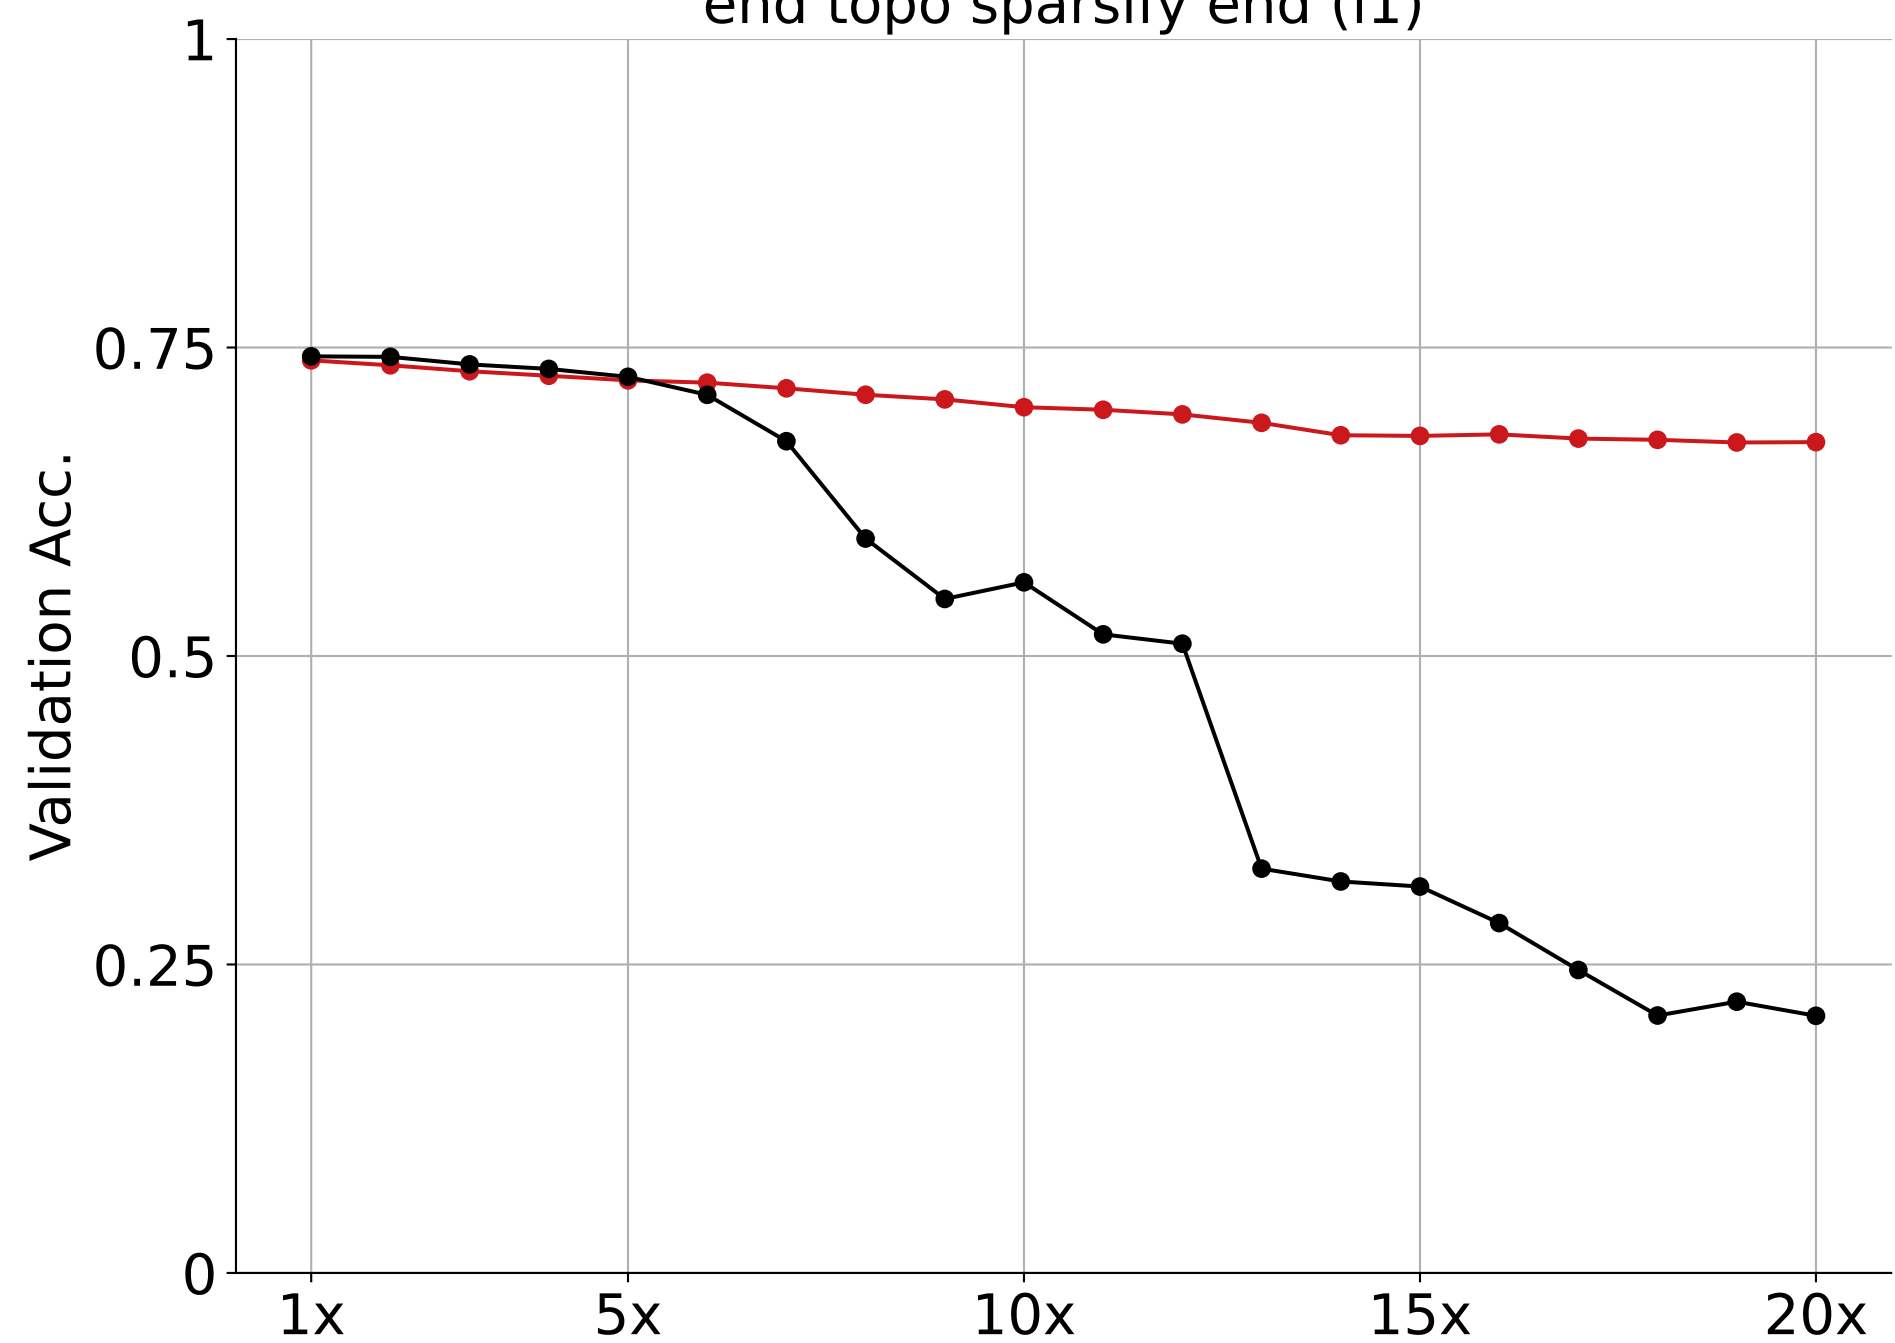

end topo sparsify end (downsampling)

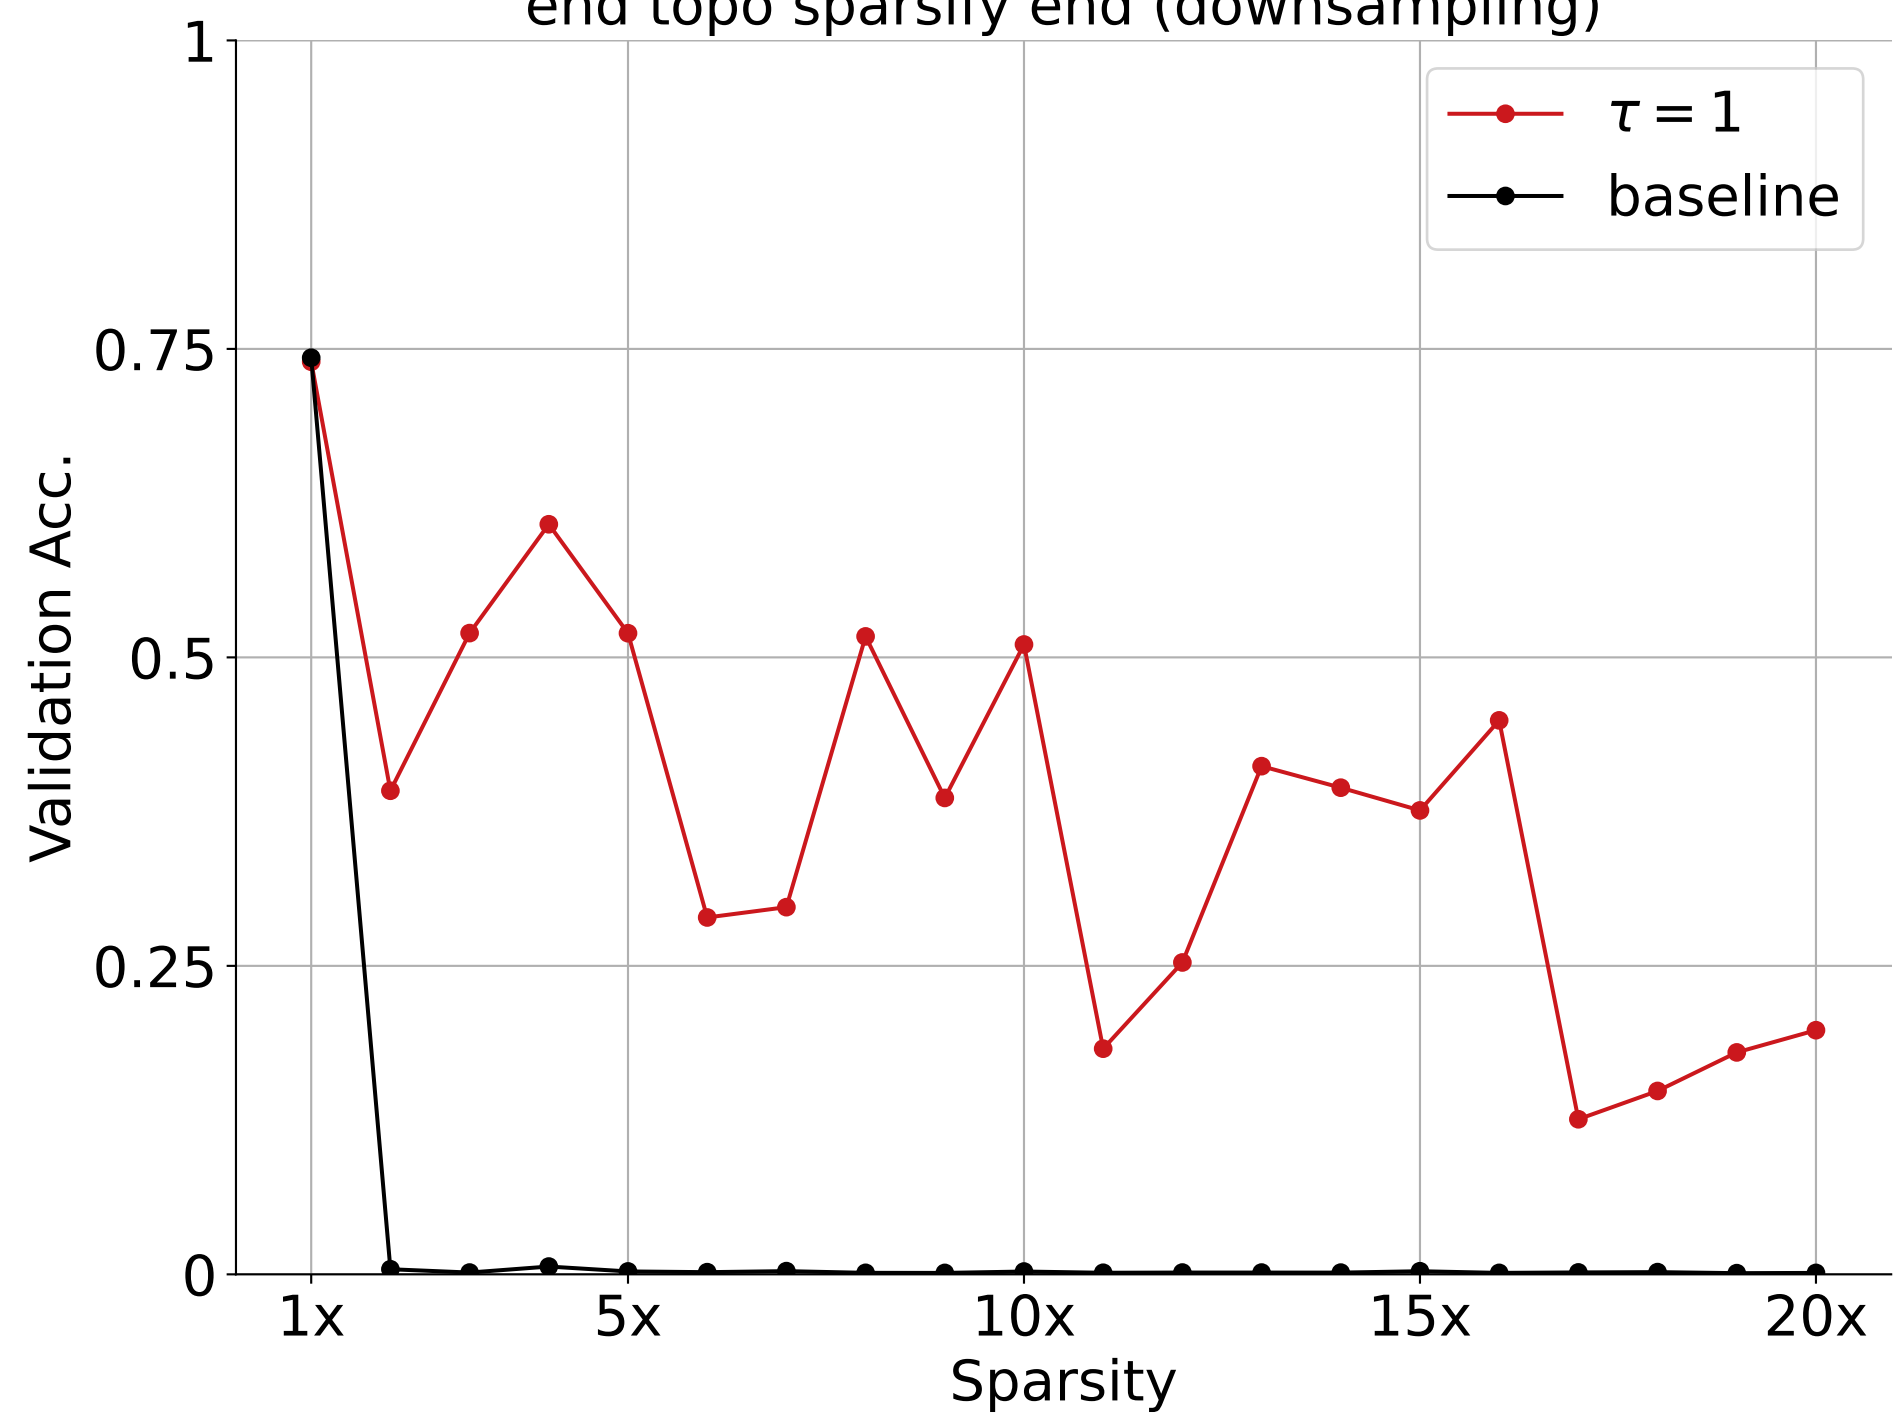

Supplement: supplementary_material [file attachment]

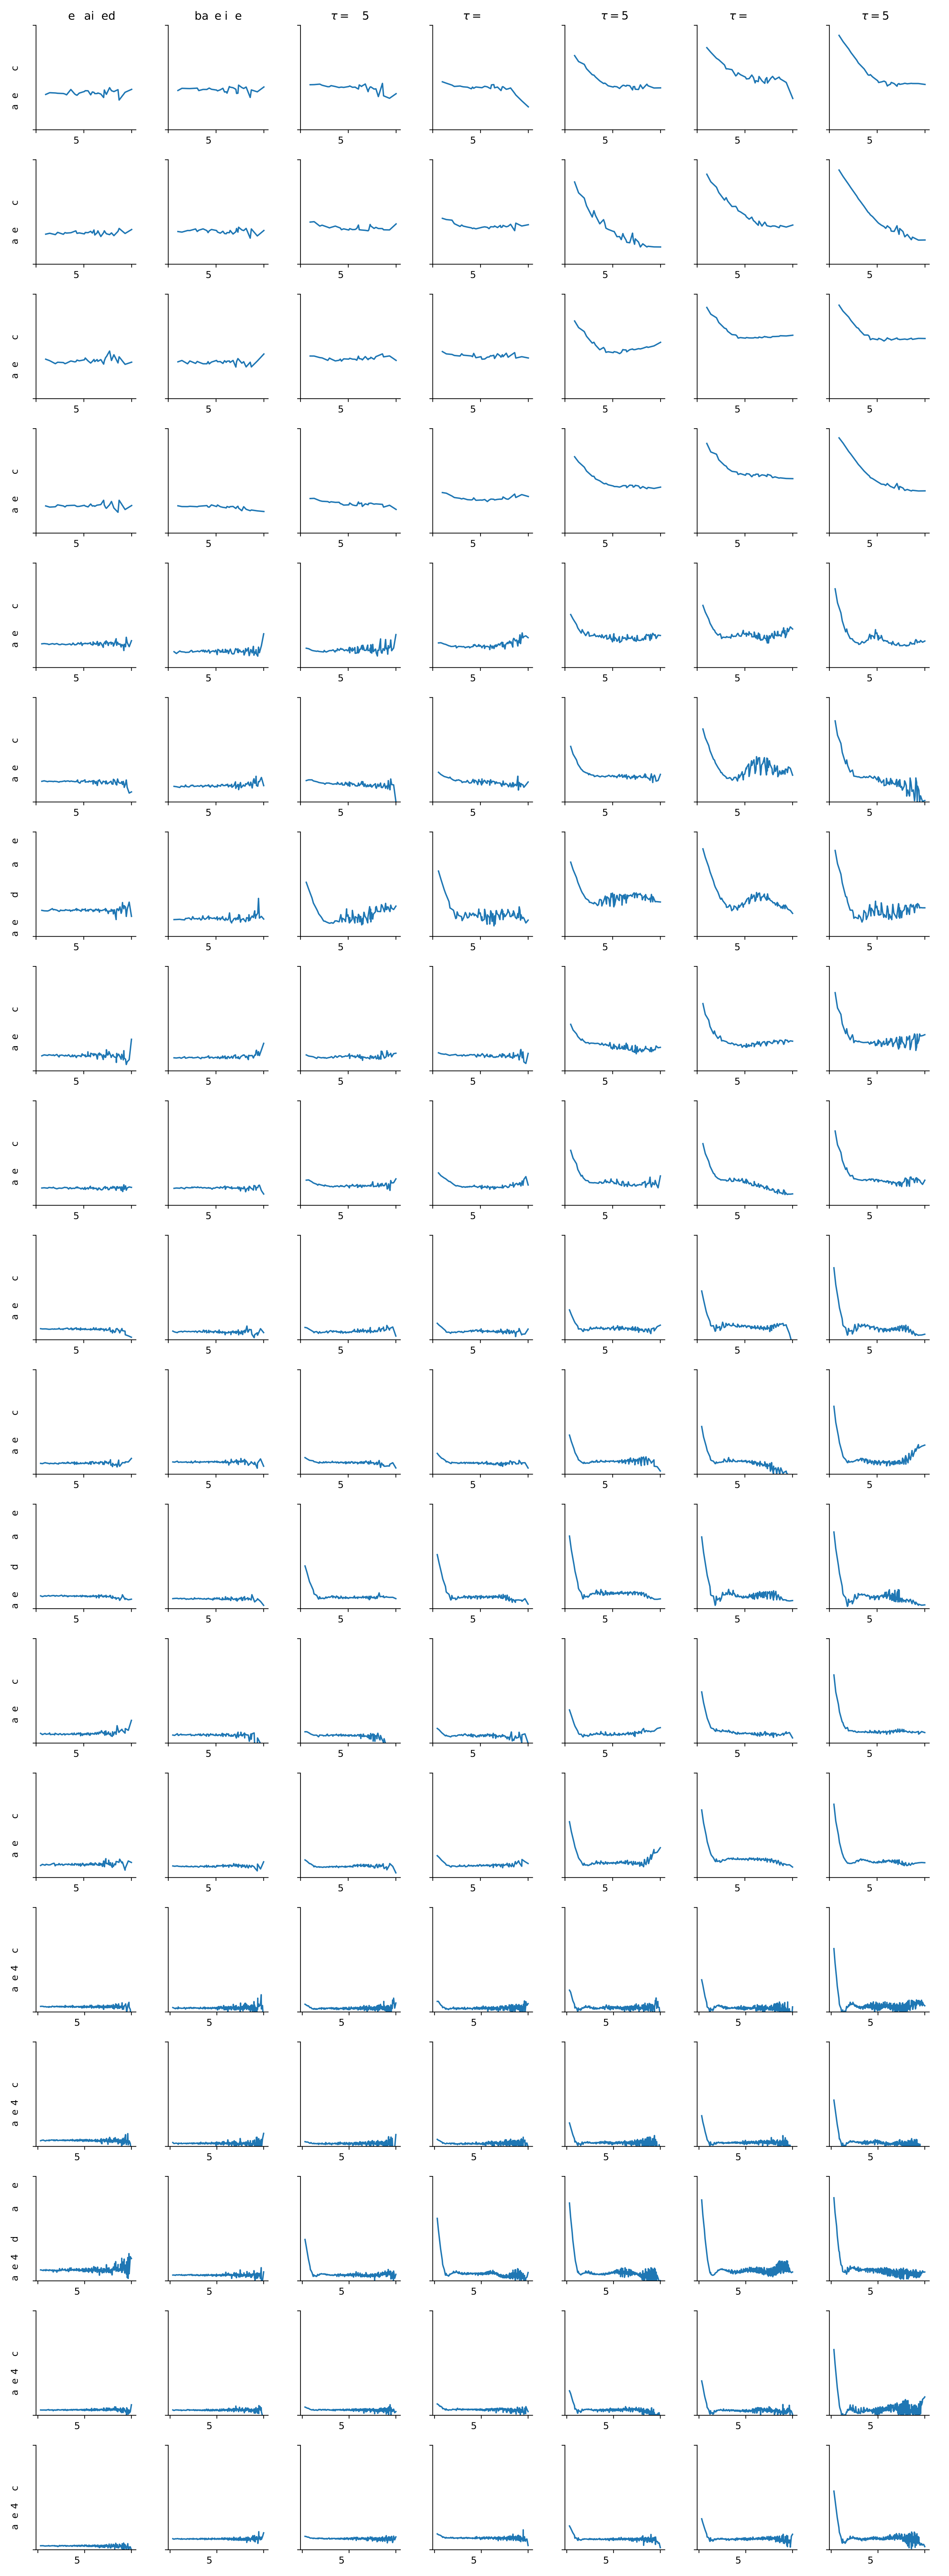

Supplement: supplementary_material [file attachment]

au vs Accuracy for Miffferent Lodels

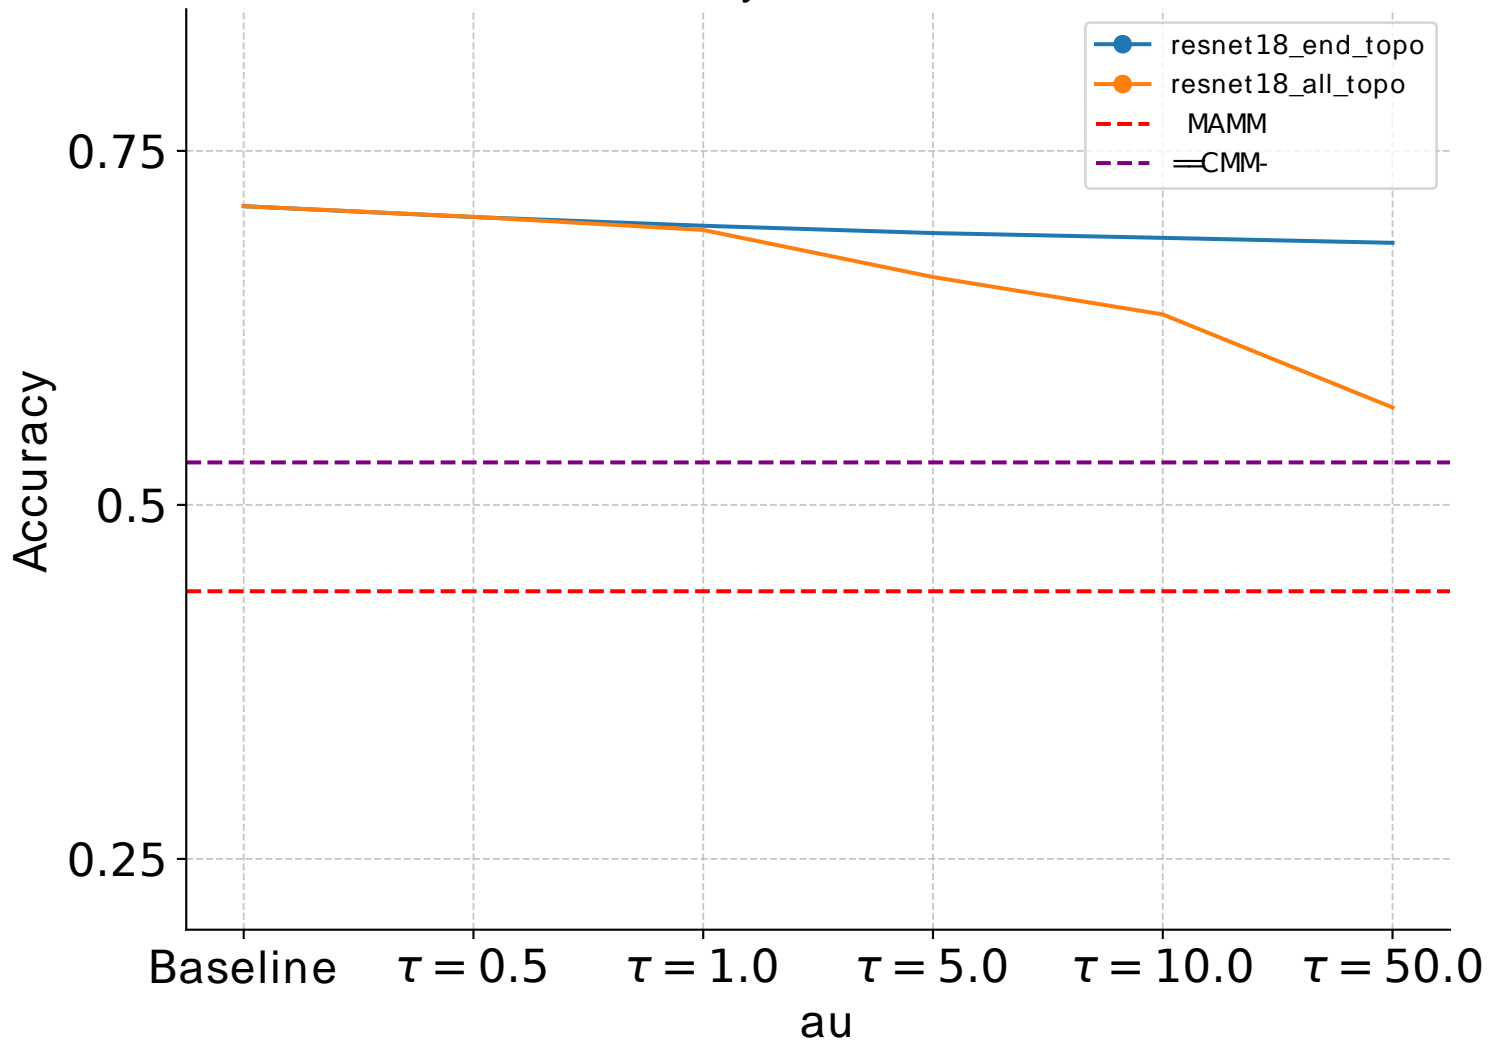

Supplement: supplementary_material [file attachment]

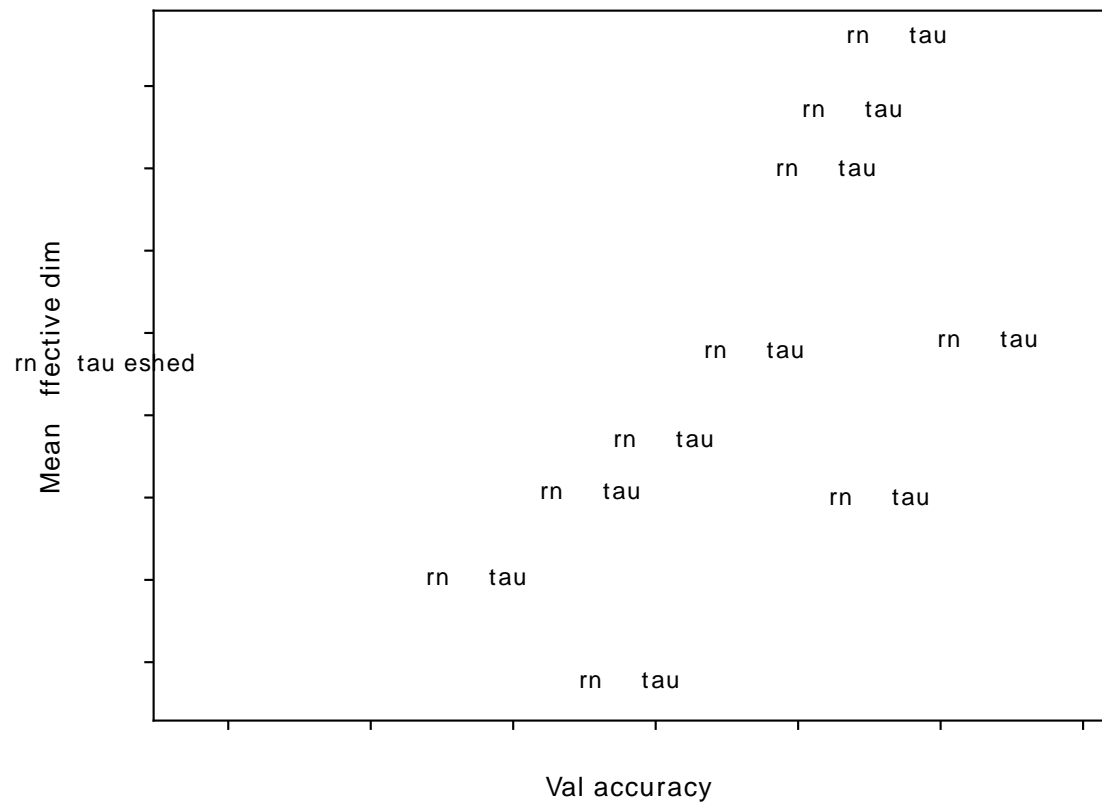

Supplement: supplementary_material [file attachment]

# Tau vs Accuracy for Different Models

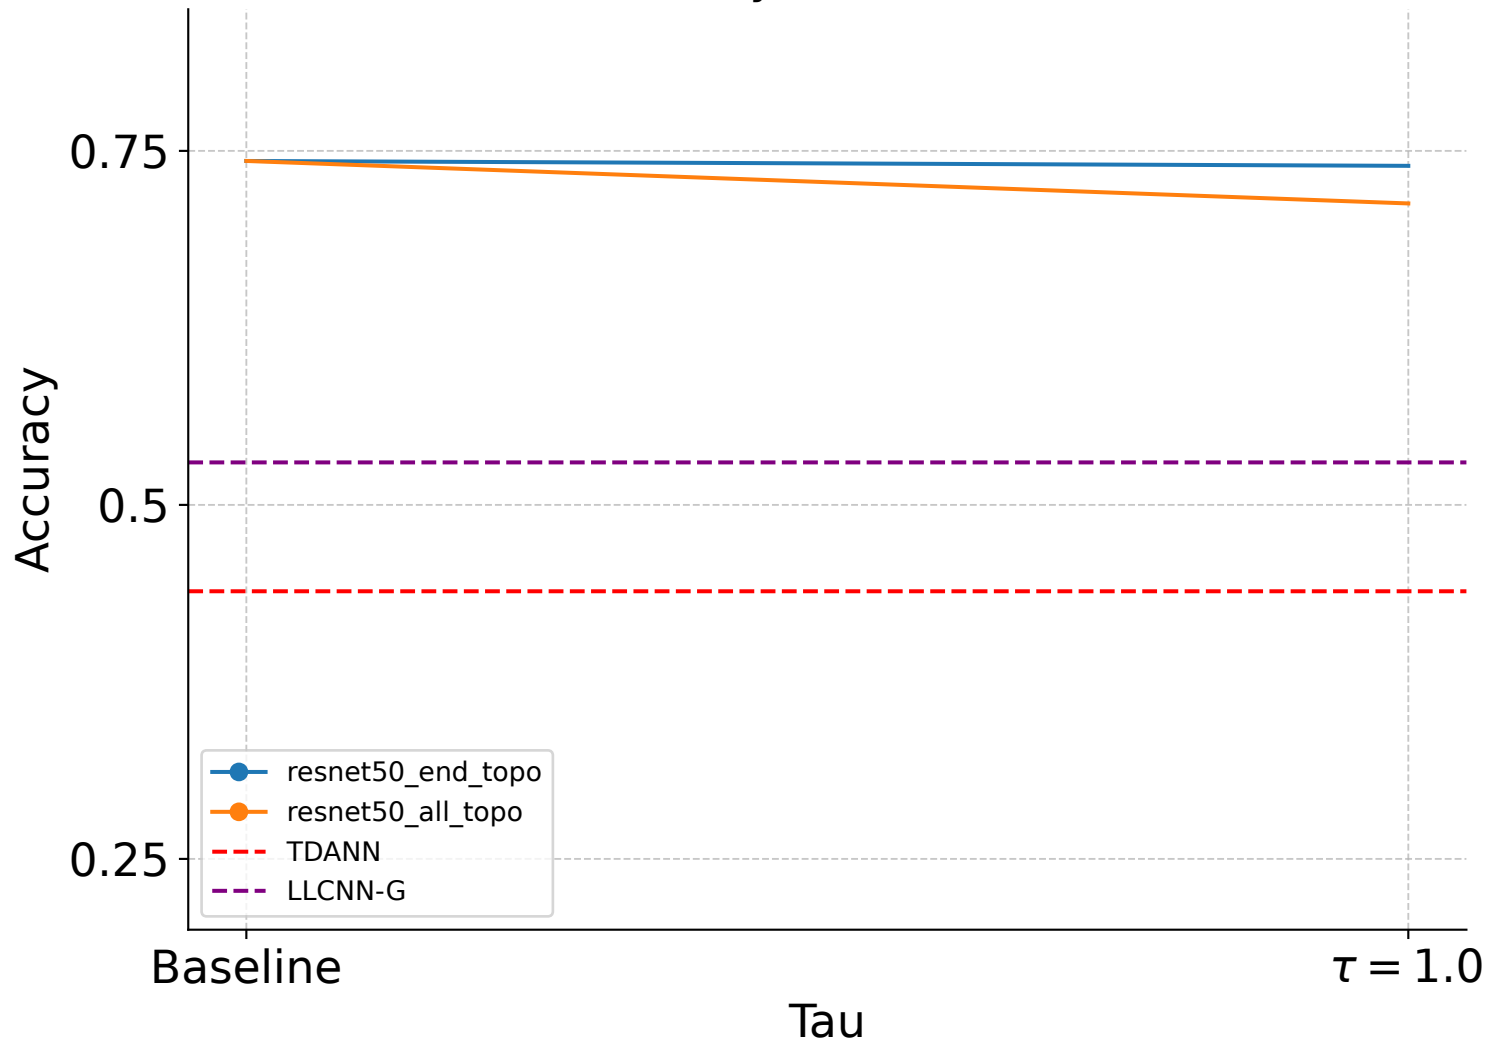

Supplement: supplementary_material [file attachment]

L1 (Rise in Loss)

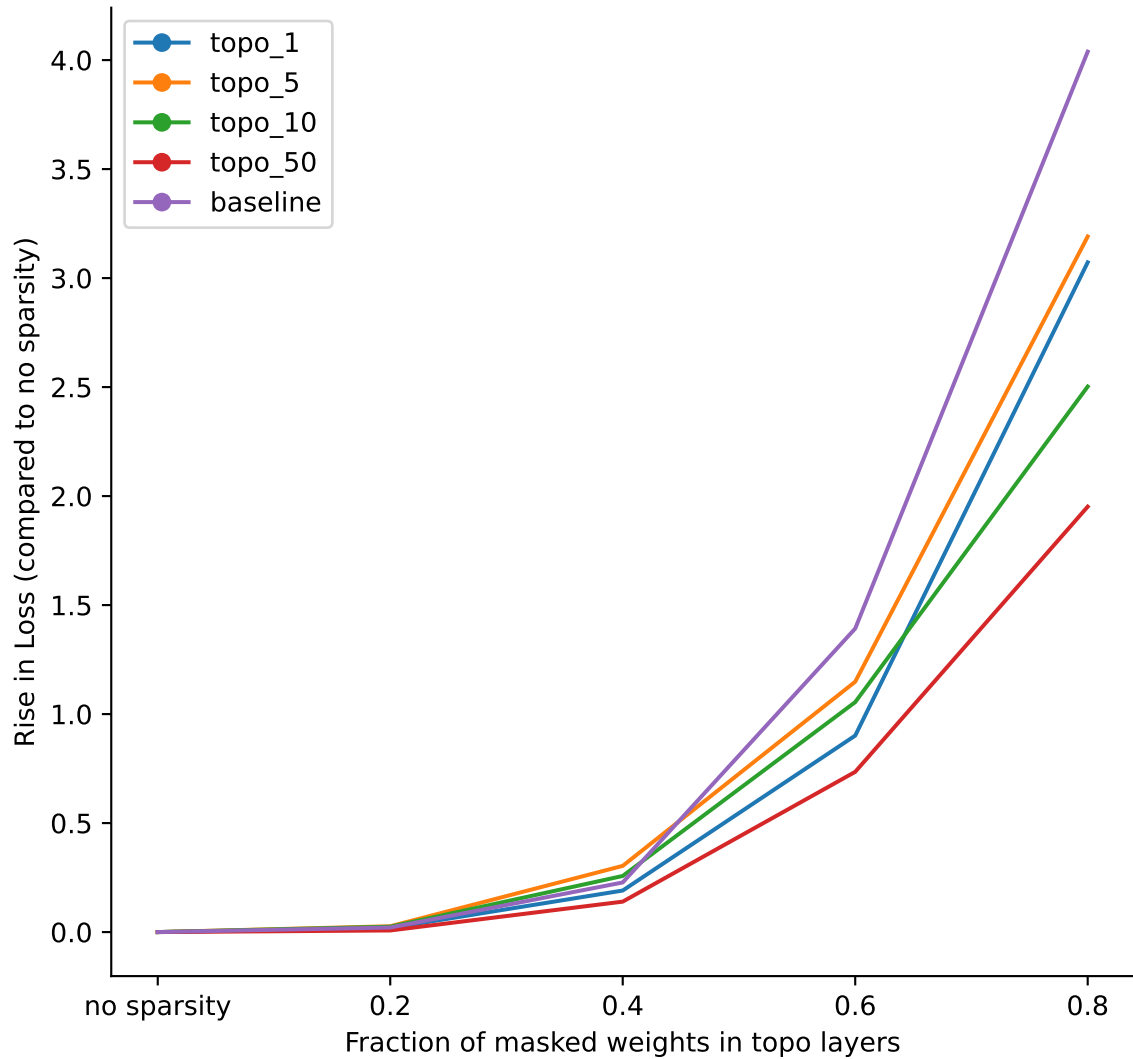

Downsampling

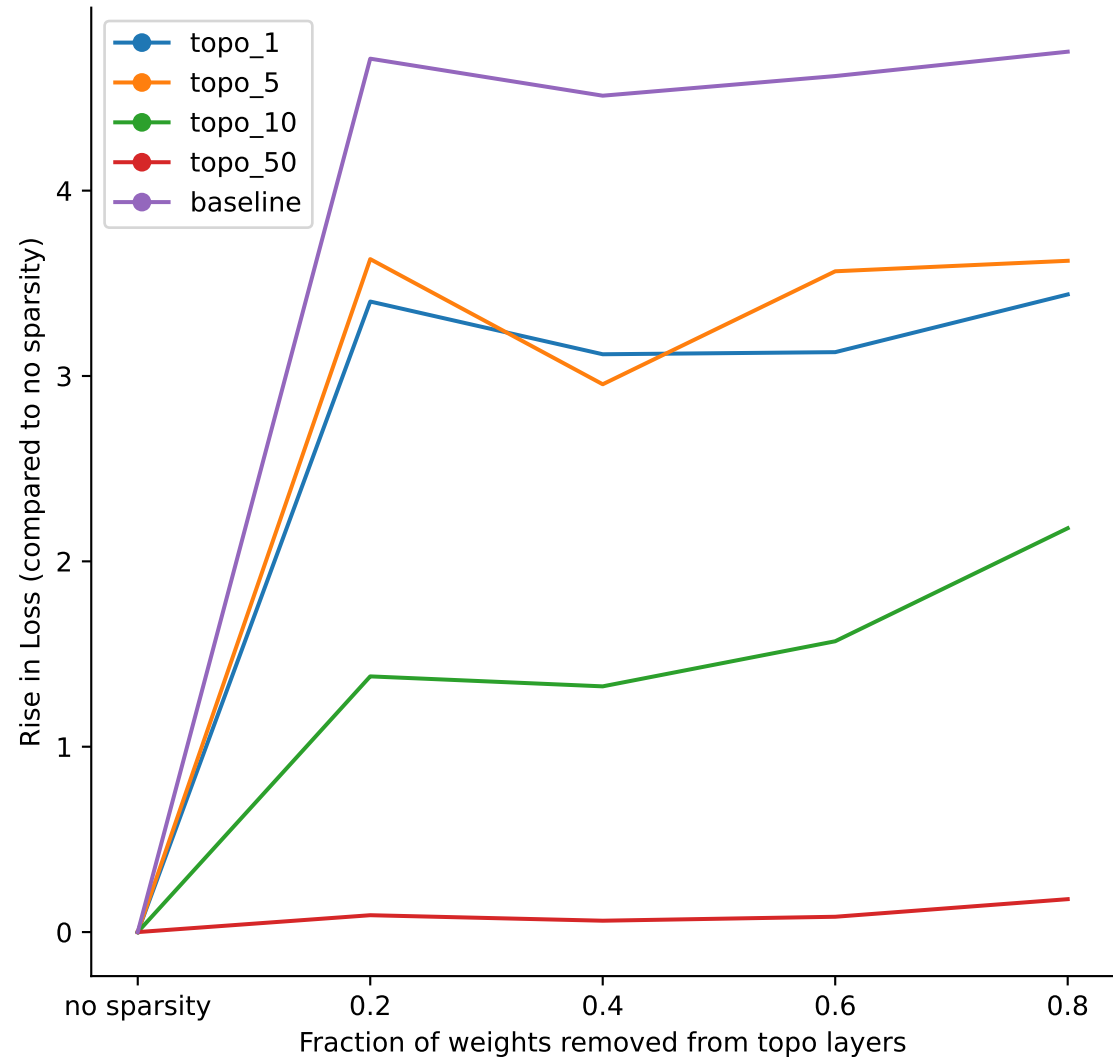

Supplement: supplementary_material [file attachment]

# Accuracy vs. Smoothness with Tau Values

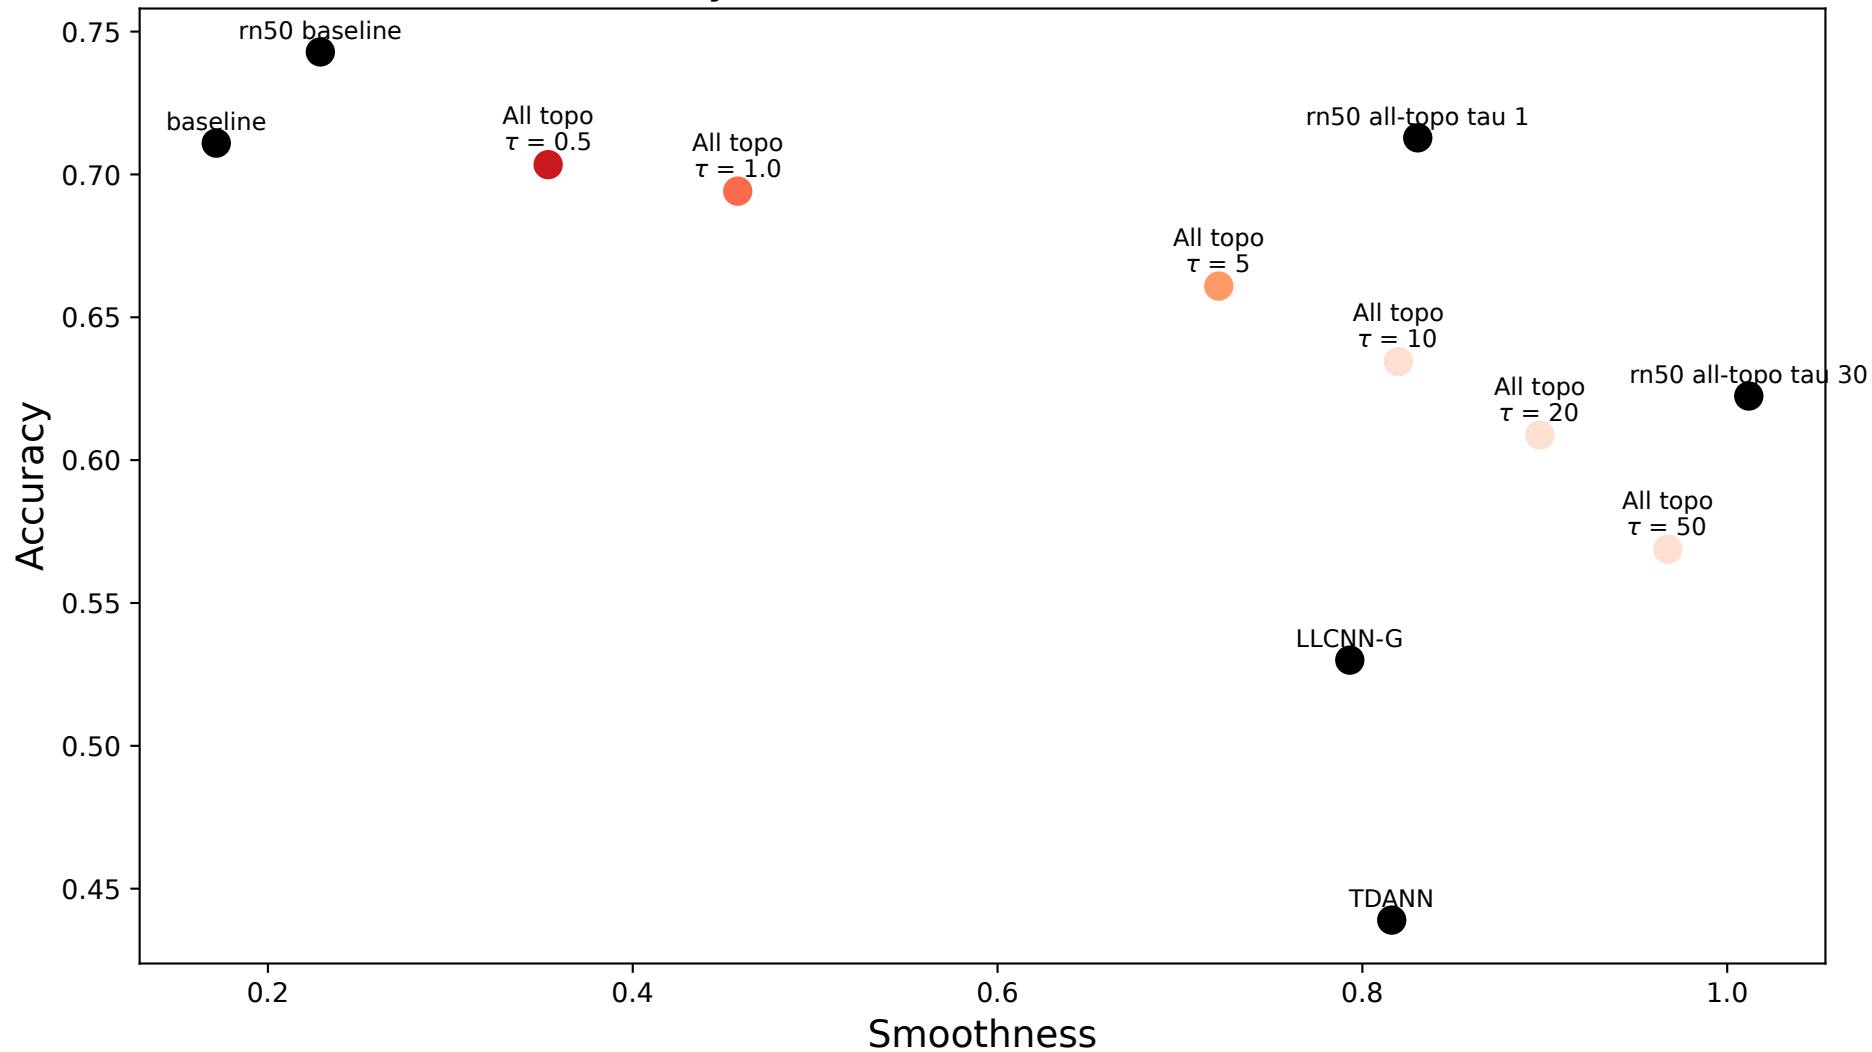

Supplement: supplementary_material [file attachment]
